# Supplementary material
Source: Royal Society of Chemistry journal article supplement (doi:10.1039/d6cc01833e)
Supplement: d6cc01833e1.pdf [file d6cc01833e1.pdf]

## ***Supporting Information***

### *Monomer-Level Strategy for High Refractive Index without Visible-Light Absorption: Vinylthiophene Incorporation into Group 14 scaffolds*

*Kanon Hirota, Yuta Takemasa, Tomoki Nakagawa and Jun Terao*

*Department of Basic Science, Graduate School of Arts and Sciences, The University of Tokyo, 3-8-1 Komaba, Meguro-ku, Tokyo 153-8902, Japan*

E-mail: [ctakemasa@g.ecc.u-tokyo.ac.jp](mailto:ctakemasa@g.ecc.u-tokyo.ac.jp), [cterao@mail.ecc.u-tokyo.ac.jp](mailto:cterao@mail.ecc.u-tokyo.ac.jp)

## **List of Contents**

### **S1. General Information**

#### **S1.1. Instruments**

#### **S1.2. Materials**

### **S2. General procedure for the preparation of substrates**

#### **S2.1. Synthesis of SiVT4**

#### **S2.2. Synthesis of SiVT3**

#### **S2.3. Synthesis of SiVT2**

#### **S2.4. Synthesis of SiVT1**

#### **S2.5. Synthesis of GeVT4**

#### **S2.6. Synthesis of SnVT4**

#### **S2.7. Preparation of polymer film by thermal radical polymerization**

#### **S2.8. Preparation of NMT-A in copolymerization with SiVT4**

### **S3. Refractive index measurements**

#### **S3.1. Refractive index measurement of SiVT1–4, GeVT4 and SnVT4**

#### **S3.2. Discussion of Refractive Indices in Thermally Cured Polymers**

### **S4. <sup>1</sup>H NMR, <sup>13</sup>C NMR and <sup>29</sup>Si NMR spectra**

### **S5. APCI-MS spectra**

### **S6. ATR-IR Spectral Analysis and Discussion**

### **S7. Computational details**

#### **S7.1. TD-DFT calculation of SiVT1–4, GeVT4 and SiVT4 dimer**

#### **S7.2. Calculated molecular refractive index of vinylthiophene unit**

#### **S7.3. Calculated structures and Cartesian coordinates**

## **S8. References**

## S1. General Information

### S1.1. Instrumentation

$^1\text{H}$  NMR (500 MHz),  $^{13}\text{C}\{^1\text{H}\}$  NMR (126 MHz),  $^{29}\text{Si}\{^1\text{H}\}$  NMR (99 MHz) spectra were measured with a Bruker AVANCE III HD 500. The  $^1\text{H}$  NMR chemical shifts were reported relative to residual protonated solvents in DMSO- $d_6$  (2.50 ppm). The  $^{13}\text{C}\{^1\text{H}\}$  NMR chemical shifts were reported relative to DMSO- $d_6$  (39.52 ppm). The  $^{29}\text{Si}\{^1\text{H}\}$  NMR chemical shifts were reported by using TMS (0.00 ppm) as an external standard. Atmospheric pressure chemical ionization time-of-flight (APCI-TOF) mass spectra were recorded in positive mode on a Bruker micrOTOF II-KE02.  $\text{CH}_3\text{CN}$  was used as solvent for APCI-TOF mass spectrum measurements. The HR-MS spectra were internally calibrated using PEG or NaTFA clusters. Absorption spectra were measured with a UV-vis absorption spectrometer (Shimadzu, UV-2600). In optical analyses, solution samples were prepared in  $\text{CH}_3\text{CN}$  for measuring their absorbance and solid-state absorption spectra were measured by a diffuse reflectance method using with  $\text{BaSO}_4$  as the reference. The refractive indices of the monomers prior to curing, was measured using the Atago (Tokyo, Japan) NAR-4T digital abbe refractometer. The refractive index after curing was determined by a spectroscopic ellipsometer, Horiba AUTO SE. Fourier-transform infrared (IR) spectra were recorded by JASCO FT /IR-4100 with the attenuated total reflection (ATR) method (attached kid: JASCO ATR PRO450-S).

### S1.2. Materials

All reagents were commercially obtained and used as received unless otherwise noted. Degassed tetrahydrofuran (THF) was purchased from Kanto Chemical and further purified by passage through active alumina under positive nitrogen pressure as described by Grubbs *et al.*<sup>1</sup> Methanol ( $\text{CH}_3\text{OH}$ ), ethyl acetate (EtOAc), acetone, acetonitrile ( $\text{CH}_3\text{CN}$ ), 5-bromothiophene-2-carboxaldehyde and *n*-butyllithium, in hexane, 1.6 mol/L were purchased from Kanto Chemical Co., Inc. Chloroform ( $\text{CHCl}_3$ ), potassium tert-butoxide, germanium(IV) chloride and 2,2,6,6-tetramethylpiperidine 1-oxyl free radical (TEMPO) were purchased from FUJIFILM Wako Chemical Corporation. Methyltriphenylphosphonium bromide, tetrachlorosilane, chlorotriethylsilane, dimethyldichlorosilane, trichloro(methyl)silane and 1,2-ethanedithiol were purchased from Tokyo Chemical Industry (TCI) Co., Ltd. Tin(IV) chloride were purchased from Sigma-Aldrich. Water used for distilled using a EYELA STILL ACE SA-2100A. The reaction at  $-78^\circ\text{C}$  was carried out using methanol and liquid nitrogen-methanol cooling bath. Spin coating was performed using a MIKASA MS-B 150 spin coater.

## S2. General procedure for the preparation of substrates

2-bromo-5-vinylthiophene was prepared by a Wittig reaction from 5-bromo-2-

thiophencarboxyaldehyde according to the previously reported procedure <sup>2</sup>.

### S2.1. Synthesis of SiVT4

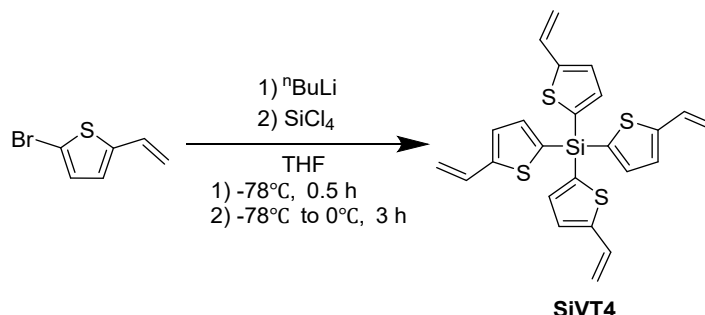

To a two-necked 50 mL flask equipped with a magnetic stirring bar were added 2-bromo-5-vinylthiophene (1.00 g, 5.46 mmol) and THF (30 mL) under N<sub>2</sub> atmosphere. The solution was cooled to -78°C, and *n*-butyllithium (1.6 M in hexane, 3.41 mL, 5.46 mmol) was added dropwise. The reaction mixture was stirring for 0.5 h, then cooled again to -78°C before tetrachlorosilane (125 μL, 1.09 mmol) was added. The mixture was allowed to warm to 0°C and stirring for 3 h. The reaction was quenched with H<sub>2</sub>O at -50°C after added TEMPO (0.85 mg, 0.00546 mmol), and the resulting mixture was extracted with EtOAc and brine (3 ×). The organic layer was dried over MgSO<sub>4</sub>, filtered, and concentrated under reduced pressure at 25°C. The residue was purified by column chromatography in silica gel (hexane) to afford a white solid (467 mg, 92% yield). HRMS (APCI) *m/z* [ *M* + *H* ]<sup>+</sup> calcd. for C<sub>24</sub>H<sub>21</sub>S<sub>4</sub>Si 465.0290, found 465.0265; <sup>1</sup>H NMR (500 MHz, DMSO-*d*<sub>6</sub>, r.t.) δ 7.37 (d, *J* = 3.51 Hz, 4H), 7.31 (d, *J* = 3.51 Hz, 4H), 6.95 (dd, *J* = 17.4, 10.9 Hz, 4H), 5.66 (d, *J* = 17.5 Hz, 4H), 5.26 (d, *J* = 11.4 Hz, 4H); <sup>13</sup>C {<sup>1</sup>H} NMR (126 MHz, DMSO-*d*<sub>6</sub>, r.t.) δ 150.4, 139.1, 130.9, 129.3, 128.0, 115.6; <sup>29</sup>Si NMR (99 MHz, DMSO-*d*<sub>6</sub>, r.t.) δ -32.3.

### S2.2. Synthesis of SiVT3

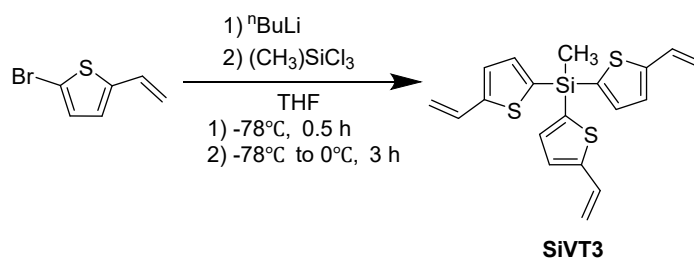

To a two-necked 50 mL flask equipped with a magnetic stirring bar were added 2-bromo-5-vinylthiophene (500 mg, 2.73 mmol) and THF (10 mL) under N<sub>2</sub> atmosphere. The solution was cooled to -78°C, and *n*-butyllithium (1.6 M in hexane, 1.71 mL, 2.73 mmol) was added dropwise. The reaction mixture was string for 0.5 h., then cooled again to -78°C before trichloromethylsilane (91.1 μL, 0.780

mmol) was added. The mixture was allowed to warm to 0°C and stirring for 3 h. The reaction was quenched with H<sub>2</sub>O at 0°C, and the resulting mixture was extracted with EtOAc and brine (3 ×). The organic layer was dried over MgSO<sub>4</sub>, filtered, and concentrated under reduced pressure at 25°C. The residue was purified by column chromatography in silica gel (hexane) to afford a colorless liquid (179 mg, 62% yield). HRMS (APCI) *m/z* [M + H]<sup>+</sup> calcd. for C<sub>19</sub>H<sub>19</sub>S<sub>3</sub>Si 371.0413, found 371.0451; <sup>1</sup>H NMR (500 MHz, DMSO-*d*<sub>6</sub>, r.t.) δ 7.34 (d, *J*=3.38 Hz, 3H), 7.25 (d, *J*= 3.34 Hz, 3H), 6.92 (dd, *J*= 17.4, 10.9 Hz, 3H), 5.61 (d, *J*= 17.4 Hz, 3H), 5.22 (d, *J*= 10.9 Hz, 3H), 0.90 (s, 3H); <sup>13</sup>C {<sup>1</sup>H} NMR (126 MHz, DMSO-*d*<sub>6</sub>, r.t.) δ 149.5, 137.8, 133.3, 129.4, 127.8, 115.0, -1.06; <sup>29</sup>Si NMR (99 MHz, DMSO-*d*<sub>6</sub>, r.t.) δ -25.4.

### S2.3. Synthesis of SiVT2

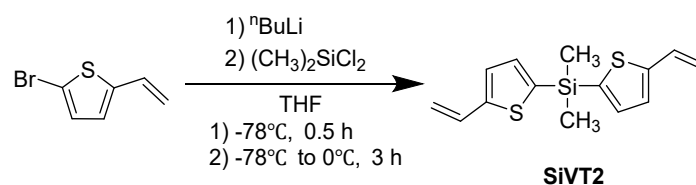

To a two-necked 50 mL flask equipped with a magnetic stirring bar were added 2-bromo-5-vinylthiophene (500 mg, 2.73 mmol) and THF (10 mL) under N<sub>2</sub> atmosphere. The solution cooled to -78°C, and *n*-butyllithium (1.6 M in hexane, 1.71 μL, 2.73 mmol) was added dropwise. The reaction mixture was stirring for 0.5 h, then cooled again to -78°C before chlorodimethylsilane (130 μL, 1.093 mmol) was added. The mixture was allowed to warm to 0°C and stirring for 3 h. The reaction was quenched with H<sub>2</sub>O at 0°C, and the mixture was extracted with EtOAc and brine(3 ×). The organic layer was dried over MgSO<sub>4</sub>, filtered, and concentrated under reduced pressure at 25°C. The residue was purified by column chromatography in silica gel (hexane) to afford a colorless liquid. (250 mg, 83% yield). HRMS (APCI) *m/z* [M + H]<sup>+</sup> calcd. for C<sub>14</sub>H<sub>17</sub>S<sub>2</sub>Si 277.0535, found 277.0536; <sup>1</sup>H NMR (500 MHz, DMSO-*d*<sub>6</sub>, r.t.) δ 7.27 (d, *J*=3.42 Hz, 2H), 7.20 (d, *J*= 3.44 Hz, 2H), 6.90 (dd, *J*= 17.4, 10.9, 2H), 5.57 (d, *J*= 17.4 Hz, 2H), 5.19 (d, *J*=10.9 Hz, 2H), 0.56 (s, 6H); <sup>13</sup>C {<sup>1</sup>H} NMR (126 MHz, DMSO-*d*<sub>6</sub>, r.t.) δ 148.5, 136.3, 136.0, 129.5, 127.8, 114.5, -0.739. <sup>29</sup>Si NMR (99 MHz, DMSO-*d*<sub>6</sub>, r.t.) δ -15.0.

### S2.4. Synthesis of SiVT1

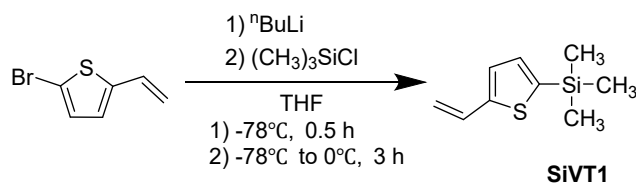

To a two-necked 50 mL flask equipped with a magnetic stirring bar were added 2-bromo-5-

vinylthiophene (500 mg, 2.73 mmol) and THF (10 mL) under N<sub>2</sub> atmosphere. The solution was cooled to -78°C, and *n*-butyllithium (1.6 M in hexane, 1.71 mL, 2.73 mmol) was added dropwise. The reaction mixture was stirred for 0.5 h., then cooled again to -78°C before chlorotrimethylsilane (276.1 μL, 2.19 mmol) was added. The mixture was allowed to warm to 0°C and stirring for 3 h. The reaction was quenched with H<sub>2</sub>O at 0 °C, and the resulting mixture was extracted with EtOAc and brine (3 ×). The organic layer was dried over MgSO<sub>4</sub>, filtered, and concentrated under reduced pressure at 25°C. The residue was purified by column chromatography in silica gel (hexane) to afford a colorless liquid (343 mg, 86% yield). HRMS (APCI) *m/z* [ *M* + *H* ]<sup>+</sup> calcd. for C<sub>9</sub>H<sub>15</sub>SSi 183.0658, found 183.0629; <sup>1</sup>H NMR (500 MHz, DMSO-*d*<sub>6</sub>, r.t.) δ 7.18 (d, *J*=3.38 Hz, 1H), 7.16 (d, *J*= 3.40 Hz, 1H), 6.89 (dd, *J*= 17.4, 10.8 Hz, 1H), 5.55 (d, *J*= 17.4 Hz, 1H), 5.17 (d, *J*= 11.7 Hz, 1H), 0.28 (s, 9H); <sup>13</sup>C {<sup>1</sup>H} NMR (126 MHz, DMSO-*d*<sub>6</sub>, r.t.) δ 147.5, 138.9, 135.0, 129.7, 127.6, 113.9, -0.24; <sup>29</sup>Si NMR (99 MHz, DMSO-*d*<sub>6</sub>, r.t.) δ -7.71.

## S2.5. Synthesis of GeVT4

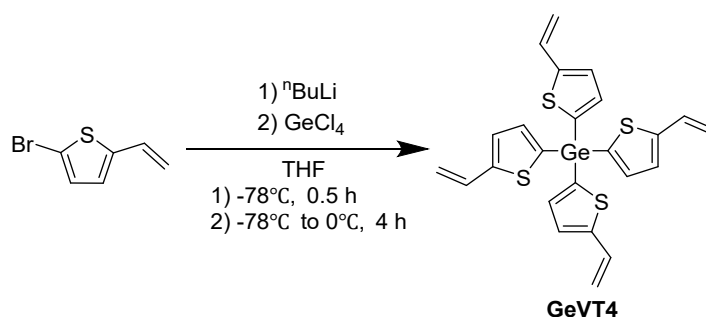

To a two-necked 50 mL flask equipped with a magnetic stirring bar were added 2-bromo-5-vinylthiophene (3.78 g, 21.0 mmol) and THF (30 mL) under N<sub>2</sub> atmosphere. The solution was cooled to -78°C, and *n*-butyllithium (1.6 M in hexane, 12.2 mL, 19.6 mmol) was added dropwise. The reaction mixture was stirring for 0.5 h, then cooled again to -78°C before tetrachlorogermane (12.3 mL, 19.6 mmol) was added. The mixture was allowed to warm to 0°C and stirring for 4h. The reaction was quenched with CH<sub>3</sub>OH at 0°C, and the mixture was extracted with CH<sub>2</sub>Cl<sub>2</sub> and brine (3 ×). The organic layer was dried with MgSO<sub>4</sub>, filtered, and evaporated under vacuum. The residue was washed with *n*-hexane, filtered, and concentrate the filtrate using an evaporator to give tetrakis(5-vinylthiophene-2-yl) germane as white solids (2.05 g, 86% yield). HRMS (APCI) *m/z* [ *M* ]<sup>+</sup> calcd for C<sub>24</sub>H<sub>21</sub>S<sub>4</sub>Ge 510.9732, found 510.9680; <sup>1</sup>H NMR (500 MHz, DMSO-*d*<sub>6</sub>, r.t.) δ 7.32-7.30 (m, 8H), 6.94 (dd, *J*= 17.4, 10.9 Hz, 4H), 5.63 (d, *J*= 17.8 Hz, 4H), 5.24 (d, *J*= 11.4 Hz, 4H); <sup>13</sup>C {<sup>1</sup>H} NMR (126 MHz, DMSO-*d*<sub>6</sub>, r.t.) δ 149.3, 137.1, 131.2, 129.2, 127.8, 115.2.

## S2.6. Synthesis of SnVT4

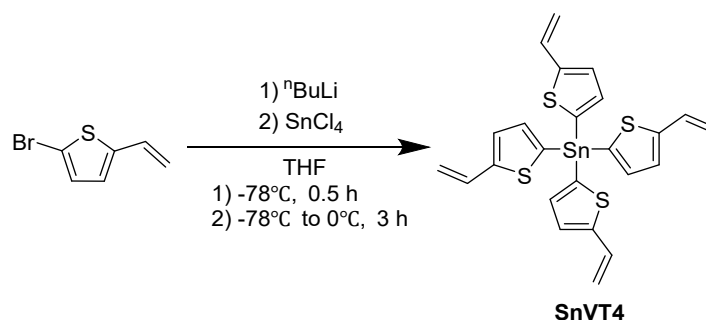

To a two-necked 50 mL flask equipped with a magnetic stirring bar were added 2-bromo-5-vinylthiophene (900 mg, 4.92 mmol) and THF (30 mL) under N<sub>2</sub> atmosphere. The solution was cooled to -78°C, and *n*-butyllithium (1.6 M in hexane, 3.07 mL, 4.92 mmol) was added dropwise. The reaction mixture was stirring for 0.5 h, then cooled again to -78°C before tin(IV) chloride (180 μL, 0.983 mmol) was added. The mixture was allowed to warm to 0°C and stirring for 3 h. The reaction was quenched with H<sub>2</sub>O at -50°C after added TEMPO (0.77 mg, 0.00492 mmol), and the resulting mixture was extracted with EtOAc and brine (3 ×). The organic layer was dried over MgSO<sub>4</sub>, filtered, and concentrated under reduced pressure at 25°C. The residue was purified by column chromatography in silica gel (hexane) to afford a white solid (134.4 mg, 25% yield). HRMS (APCI) *m/z* [M + H]<sup>+</sup> calcd. for C<sub>24</sub>H<sub>21</sub>S<sub>4</sub>Sn 556.9543, found 556.9541; <sup>1</sup>H NMR (500 MHz, DMSO-*d*<sub>6</sub>, r.t.) δ 7.30 (d, *J* = 6.07 Hz, 8H), 6.95 (dd, *J* = 16.5, 11.7 Hz, 4H), 5.61 (d, *J* = 17.4, 4H), 5.21 (d, *J* = 10.8 Hz, 4H); <sup>13</sup>C {<sup>1</sup>H} NMR (126 MHz, DMSO-*d*<sub>6</sub>, r.t.) δ 149.3, 138.2, 133.2, 129.4, 127.6, 114.5.

## S2.7. Preparation of polymer film by thermal radical polymerization

A mixture of SiVT4 (0.116 g, 0.25 mmol), ADVN (0.062 mg, 0.00025 mmol) and toluene (250 μL) were placed in a dry 10 mL flask, and then the solution was degassed by three freeze-evacuate-thaw cycles. After the solution was sandwiched between two glass plates with 300 μm Teflon sheet as a spacer and cured by heating at 60°C for 24 h (Figure S1).

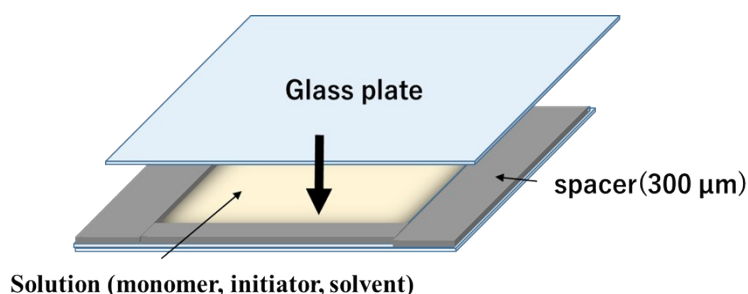

**Figure S1.** Schematic image of curing process.

## S2.8. Copolymerization of NMT-A with SiVT4

Copolymerization of NMT-A with SiVT4 was carried out in the spin-coated film of mixture. A thin film of the NMT-A/ SiVT4 mixture (0.2  $\mu\text{L}$ , 3000 rpm, 20 s) was cured at 100°C for 1 h a nitrogen atmosphere to obtain the polymer. Polymerization was performed for three different formulations; NMT-A alone (Entry 1), NMT-A with 10 wt% SiVT4 (Entry 2), and NMT-A with 20 wt% SiVT4 (Entry 3). For entry1, 500 mg of NMT-A was mixed with 5 mg of ADVN (initiator) and 1.5 mg of BYK-307 (leveling agent). Entry 2 consisted of 220 mg of NMT-A, 24,4 mg of SiVT4, 2.44 mg of ADVN, and 0.73 mg of BYK-307. Finally, Entry 3 contained 200 mg of NMT-A, 50 mg of SiVT4, 2.5 mg of ADVN, and 0.75 mg of BYK-307.

## S3. Refractive index measurements

### S3.1. Refractive index measurement of SiVT1–SiVT4, GeVT4 and SnVT4

The liquid monomers SiVT1, SiVT2 and SiVT3 were measured directly using an abbe refractometer at the Sodium D line (589 nm). Since SiVT4, GeVT4 and SnVT4 are solids, mixtures with NMT-A were prepared. The refractive indices of neat NMT-A and mixtures containing 10 wt% and 20 wt% of each compound were measured. All Values are reported as mean  $\pm$  standard deviation from four independent measurements ( $n=4$ ). The refractive index showed a linear dependence on composition, and the refractive index of the pure compound was obtained by linear extrapolation to 100 wt%.

The refractive index of neat NMT-A was 1.60 ( $\pm 0.0000$ ). For SiVT4, mixtures containing 10 wt% and 20 wt% SiVT4 were 1.61 ( $\pm 0.0008$ ) and 1.61 ( $\pm 0.0022$ ), and linear extrapolation gave an estimated value of 1.68 for the pure SiVT4 (Figure S2). For GeVT4, mixtures containing 10 wt% and 20 wt% GeVT4 in NMT-A were 1.61 ( $\pm 0.0008$ ) and 1.62 ( $\pm 0.0022$ ), and linear extrapolation gave an estimated refractive index of 1.68 for pure GeVT4 (Figure S3). For SnVT4, mixtures containing 10 wt% and 20 wt% in NMT-A were 1.60 ( $\pm 0.0008$ ) and 1.61 ( $\pm 0.0008$ ), and linear extrapolation gave an estimated refractive index of 1.69 for pure SnVT4 (Figure S4).

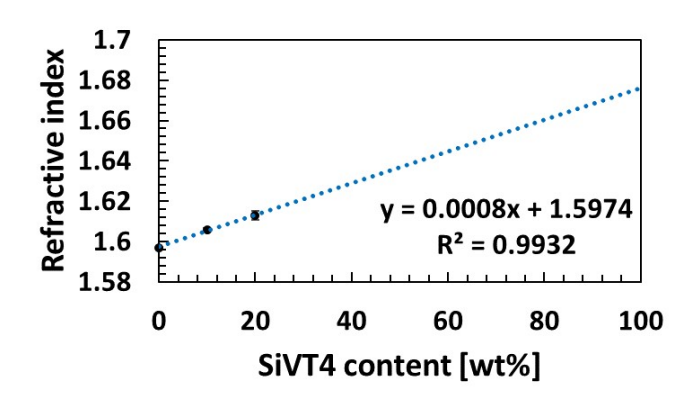

Figure S2. Refractive index of NMT-A/SiVT4 mixtures as a function of SiVT4 content

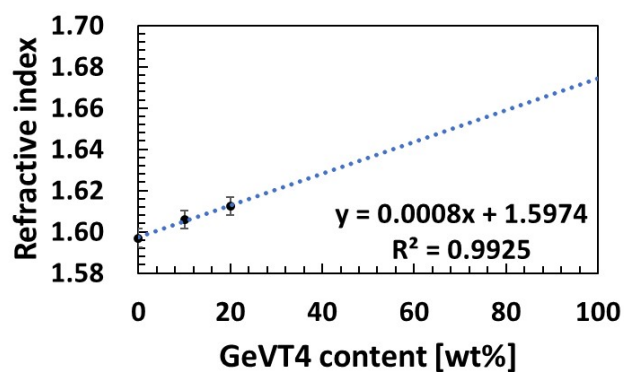

Figure S3. Refractive index of NMT-A/GeVT4 mixtures as a function of GeVT4 content

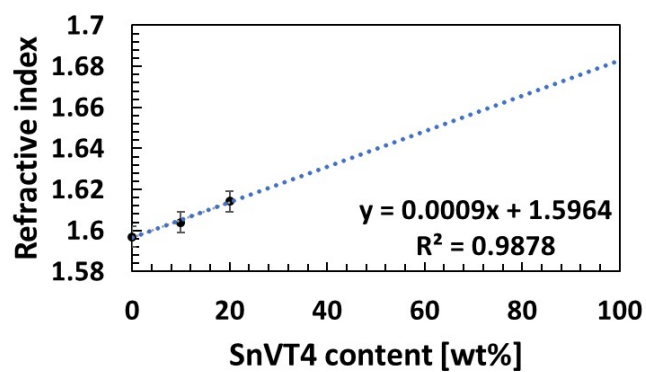

Figure S4. Refractive index of NMT-A/SnVT4 mixtures as a function of SnVT4 content

### **S3.2. Discussion of Refractive Indices in Thermally Cured Polymers**

To better understand the origin of the refractive-index enhancement in SiVT4-containing formulations, refractive indices before and after thermal curing were compared.

Neat NMT-A showed an increase in refractive index from 1.60 to 1.62 after curing at 100 °C for 1 h. In comparison, the formulation containing 10 wt% SiVT4 increased from 1.60 to 1.67, while that containing 20 wt% SiVT4 increased from 1.61 to 1.68.

These results show that the enhancement develops through two contributions: incorporation of SiVT4 into the uncured formulation maintains or slightly increases refractive index, and subsequent curing leads to a much larger increase than observed for neat NMT-A alone. This behavior indicates that the high refractive-index performance arises from the cooperative effects of the SiVT4 molecular structure, namely its intrinsically high molar refraction together with efficient network formation during curing.

To better understand the origin of the refractive-index enhancement in SiVT4-containing formulations, the refractive indices before and after thermal curing were compared using the samples described above. Neat NMT-A showed an increase in refractive index from 1.60 to 1.62 after curing at 100 °C for 1 h. In comparison, the formulation containing 10 wt% SiVT4 increased from 1.60 to 1.67, while that containing 20 wt% SiVT4 increased from 1.61 to 1.68.

These results show that the enhancement develops in two contributions: incorporation of SiVT4 into the uncured formulation maintains or slightly increases refractive index, and subsequent curing leads to a much larger increase than observed for neat NMT-A alone. This behavior indicates that the high refractive-index performance arises from the cooperative effects of the SiVT4 molecular structure, namely its intrinsically high molar refraction together with efficient network formation during curing.

#### S4. $^1\text{H}$ NMR, $^{13}\text{C}$ NMR and $^{29}\text{Si}$ NMR spectra

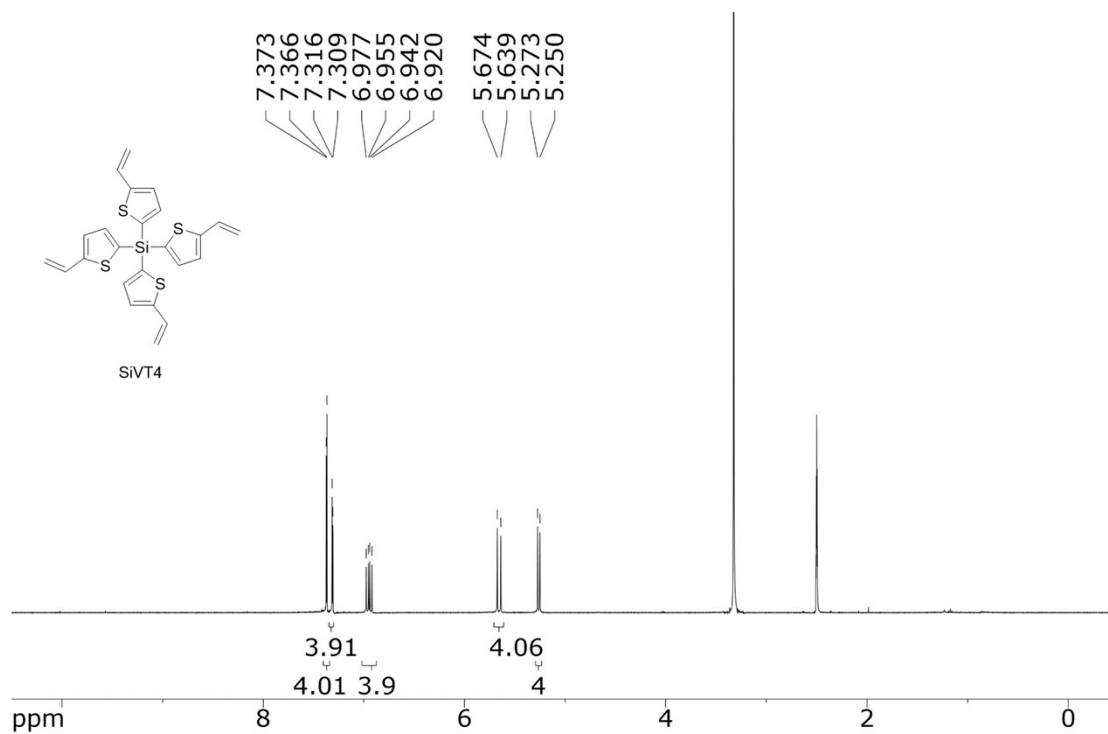

Figure S5.  $^1\text{H}$  NMR spectrum of SiVT4 (500 MHz, DMSO- $d_6$ , r.t.)

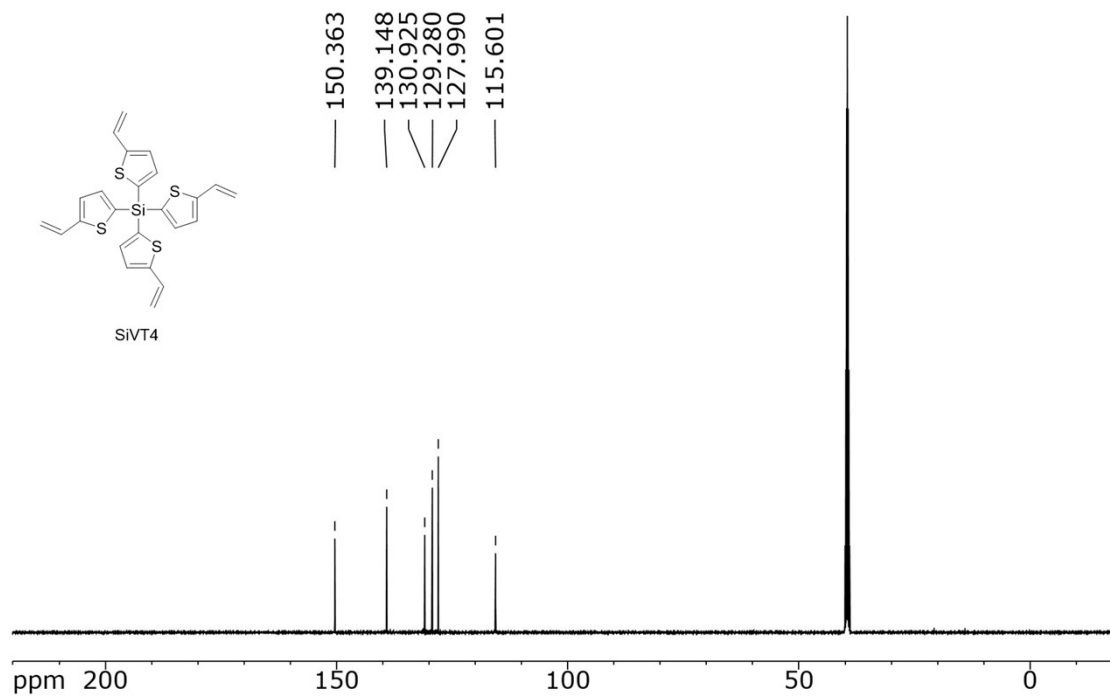

Figure S6.  $^{13}\text{C}\{^1\text{H}\}$  NMR spectrum of SiVT4 (126 MHz, DMSO- $d_6$ , r.t.)

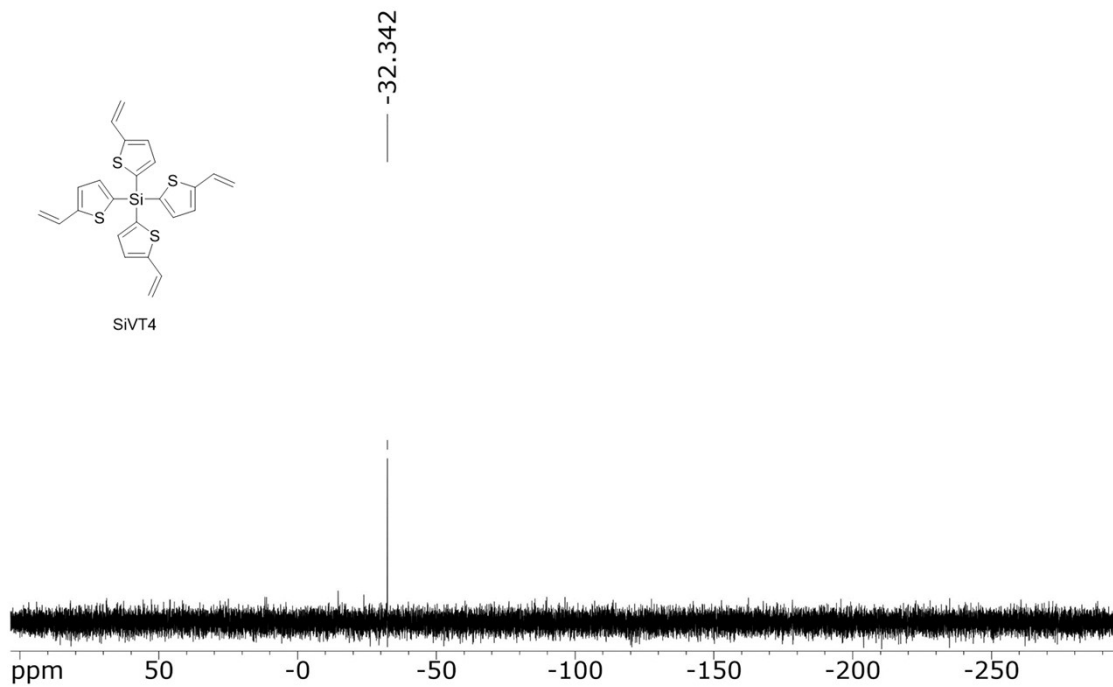

**Figure S7.** <sup>29</sup>Si{<sup>1</sup>H} NMR spectrum of SiVT4 (99 MHz, DMSO-*d*<sub>6</sub>, r.t.)

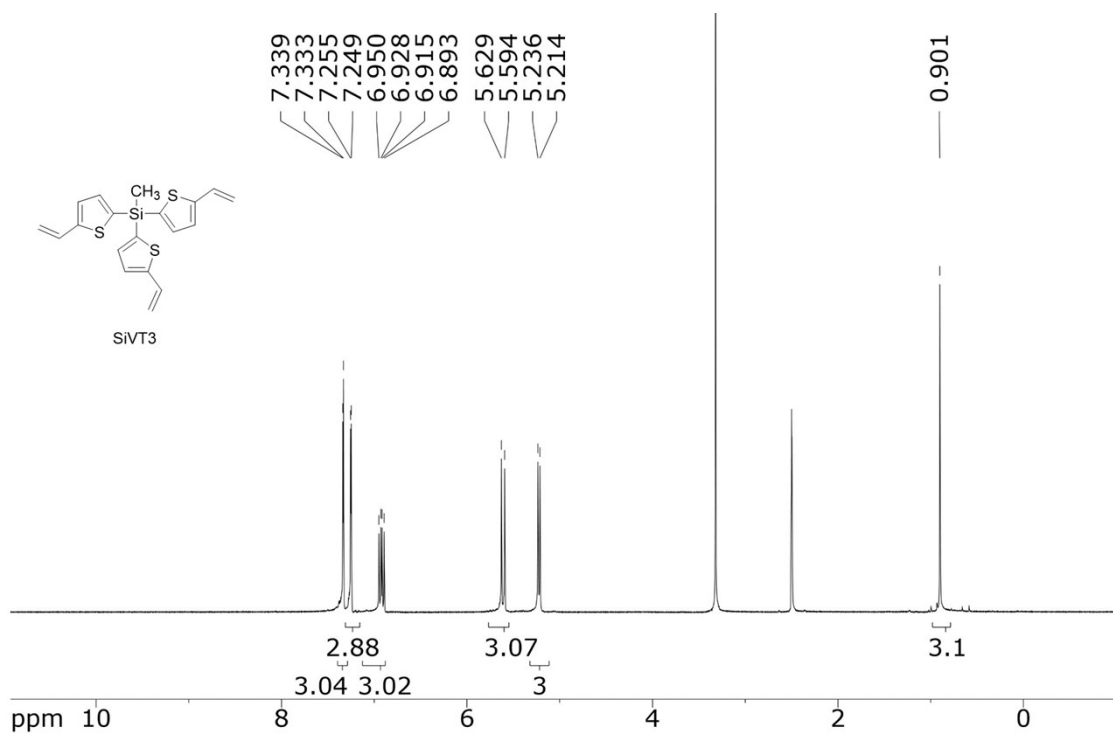

**Figure S8.** <sup>1</sup>H NMR spectrum of SiVT3 (500 MHz, DMSO-*d*<sub>6</sub>, r.t.)

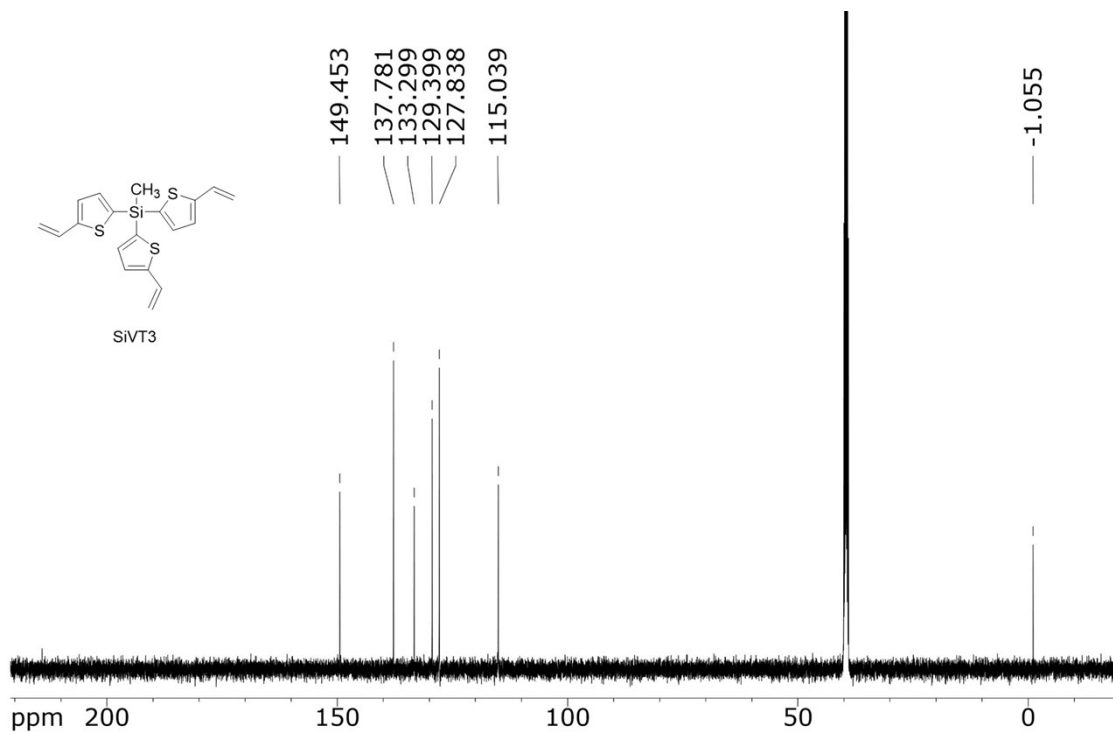

**Figure S9.**  $^{13}\text{C}\{^1\text{H}\}$  NMR spectrum of SiVT3 (126 MHz, DMSO- $d_6$ , r.t.)

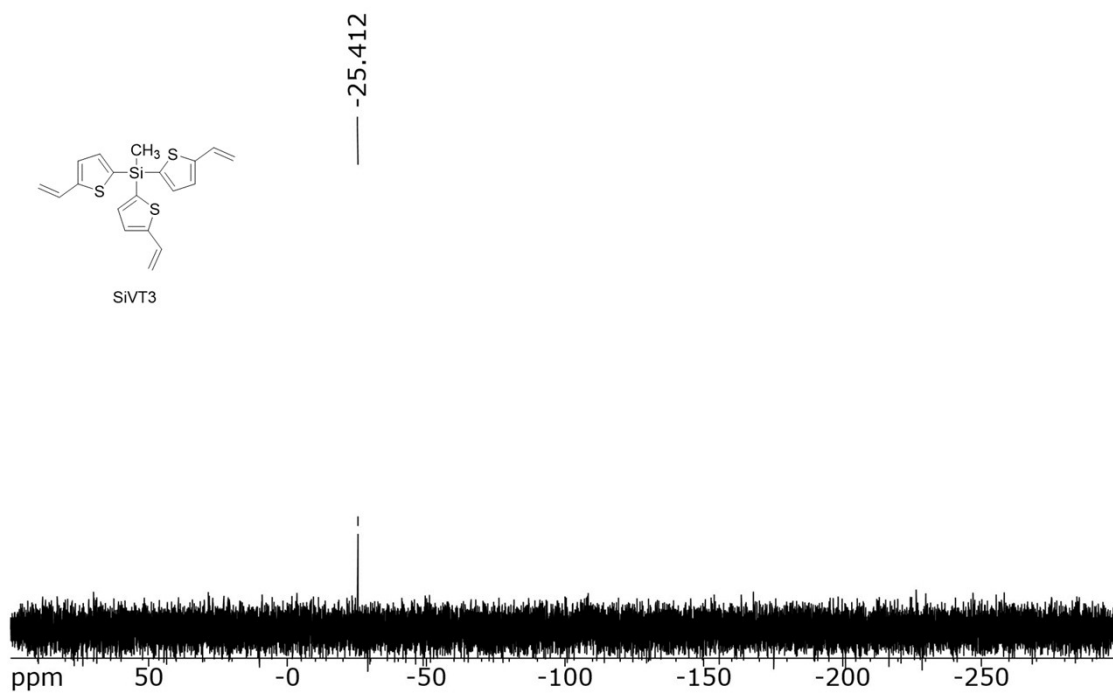

**Figure S10.**  $^{29}\text{Si}\{^1\text{H}\}$  NMR spectrum of SiVT3 (99 MHz, DMSO- $d_6$ , r.t.)

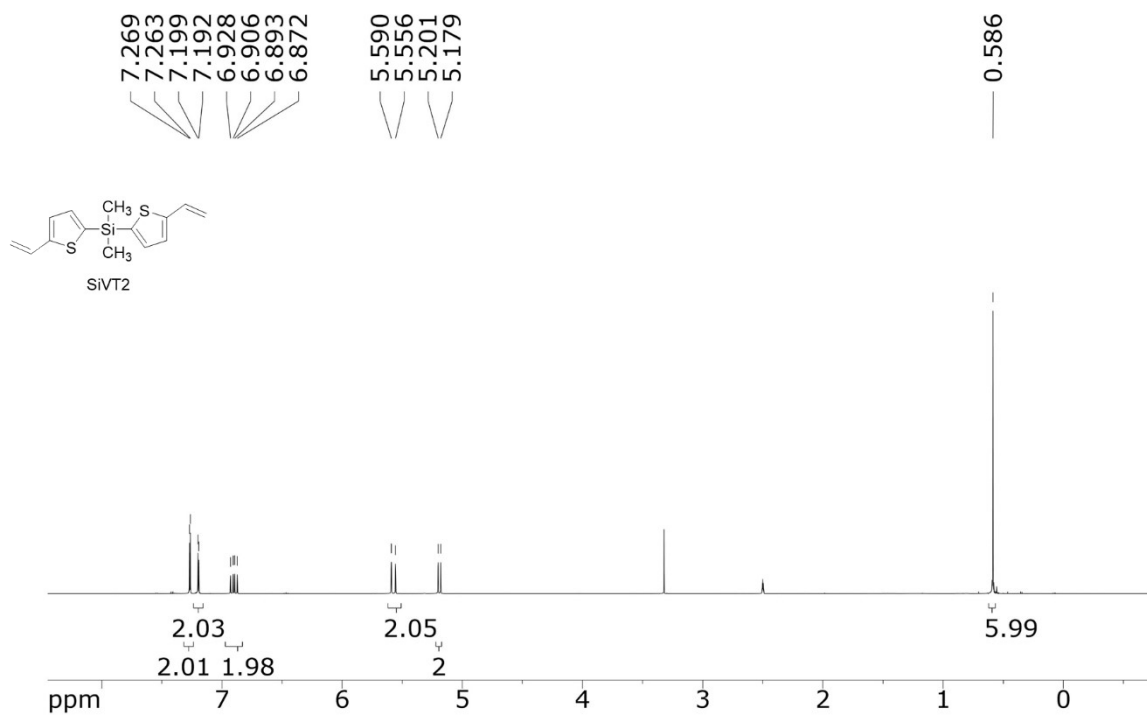

**Figure S11.** <sup>1</sup>H NMR spectrum of SiVT2 (500 MHz, DMSO-*d*<sub>6</sub>, r.t.)

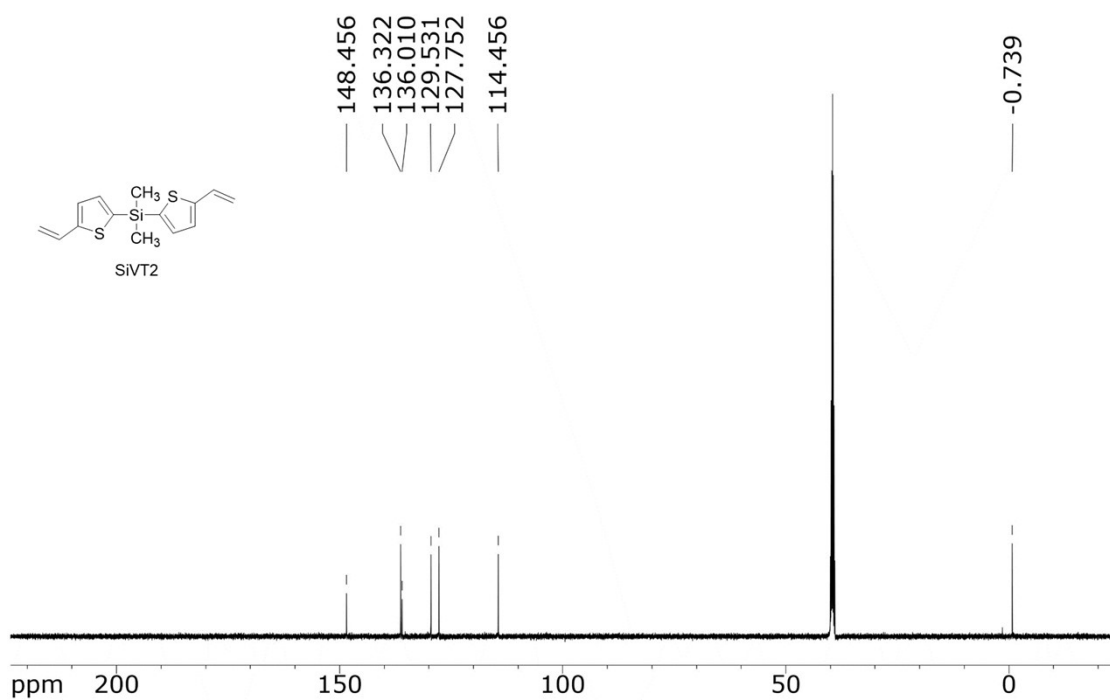

**Figure S12.** <sup>13</sup>C {<sup>1</sup>H} NMR spectrum of SiVT2 (126 MHz, DMSO-*d*<sub>6</sub>, r.t.)

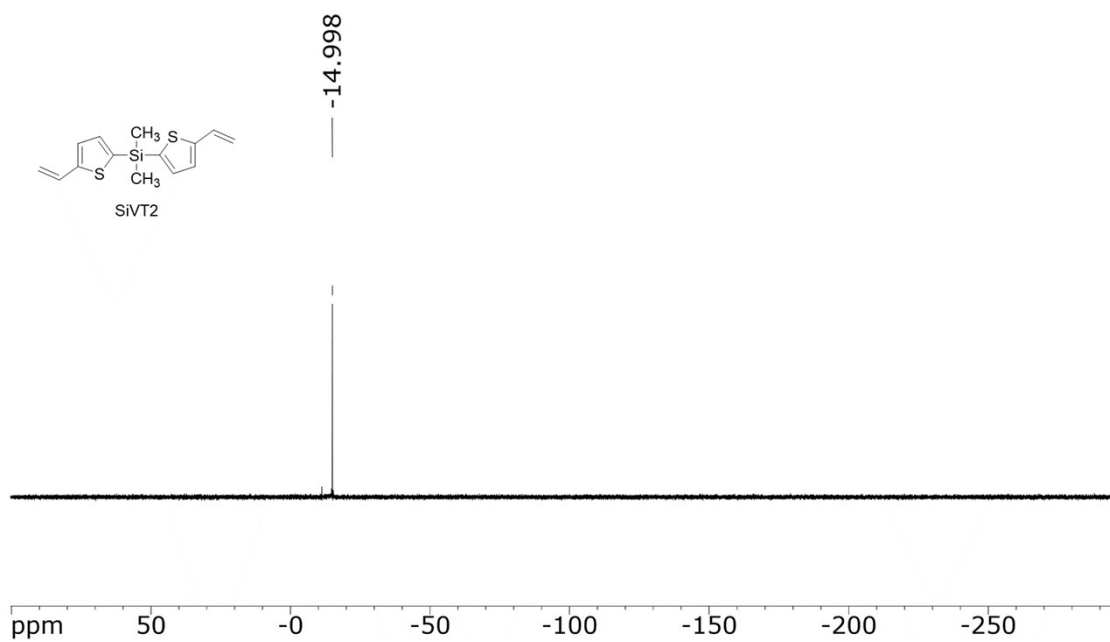

**Figure S13.**  $^{29}\text{Si}\{^1\text{H}\}$  NMR spectrum of SiVT2 (99 MHz, DMSO- $d_6$ , r.t.)

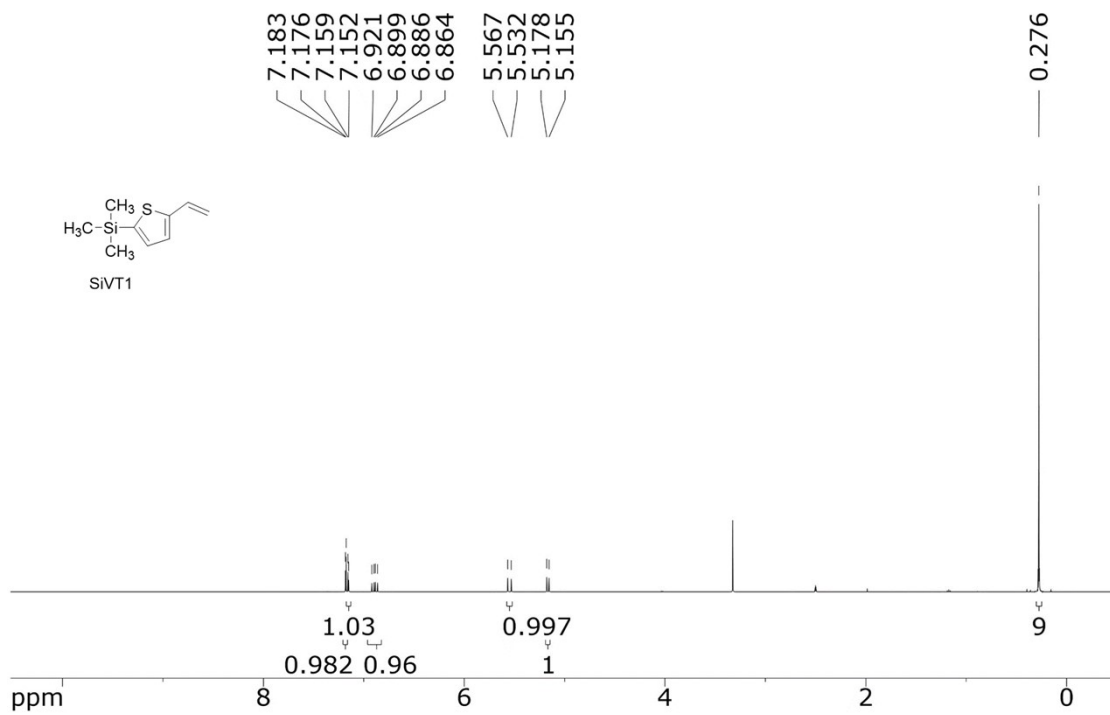

**Figure S14.**  $^1\text{H}$  NMR spectrum of SiVT1 (500 MHz, DMSO- $d_6$ , r.t.)

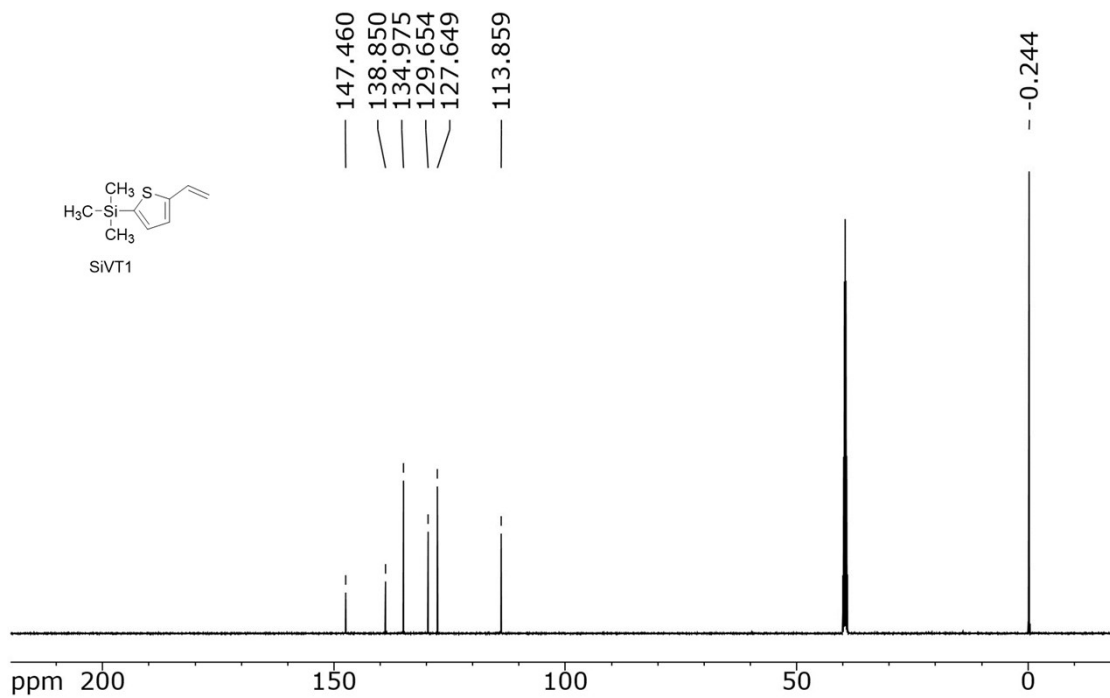

**Figure S15.**  $^{13}\text{C}\{^1\text{H}\}$  NMR spectrum of SiVT1 (126 MHz,  $\text{DMSO-}d_6$ , r.t.)

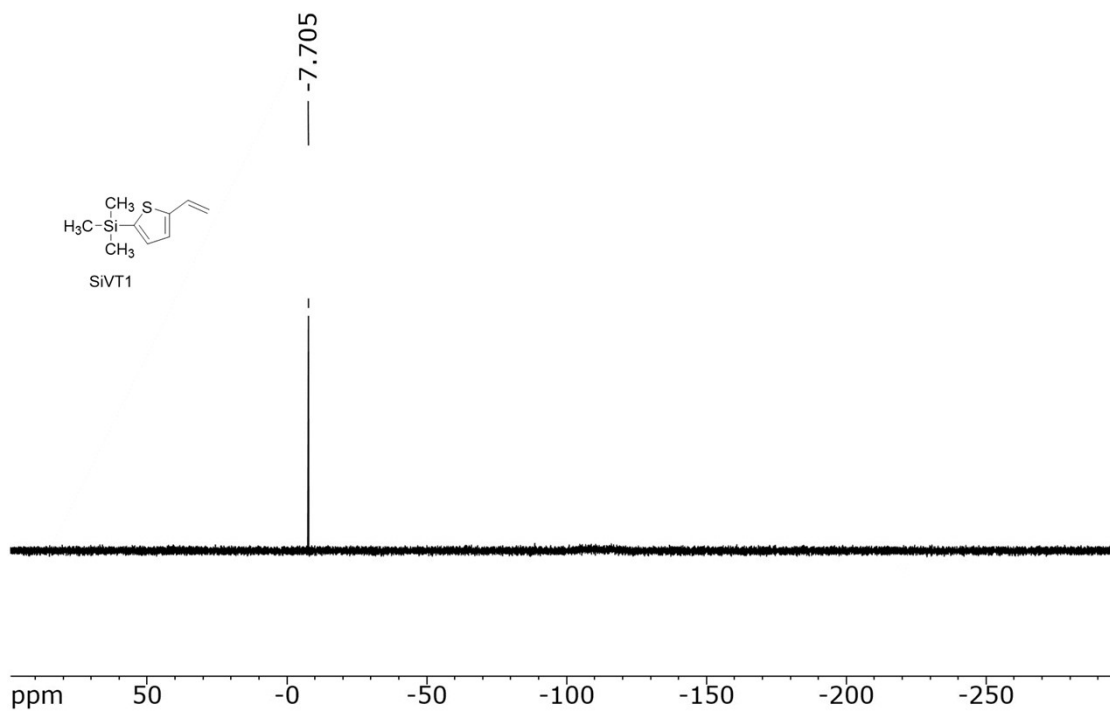

**Figure S16.**  $^{29}\text{Si}\{^1\text{H}\}$  NMR spectrum of SiVT1 (99 MHz,  $\text{DMSO-}d_6$ , r.t.)

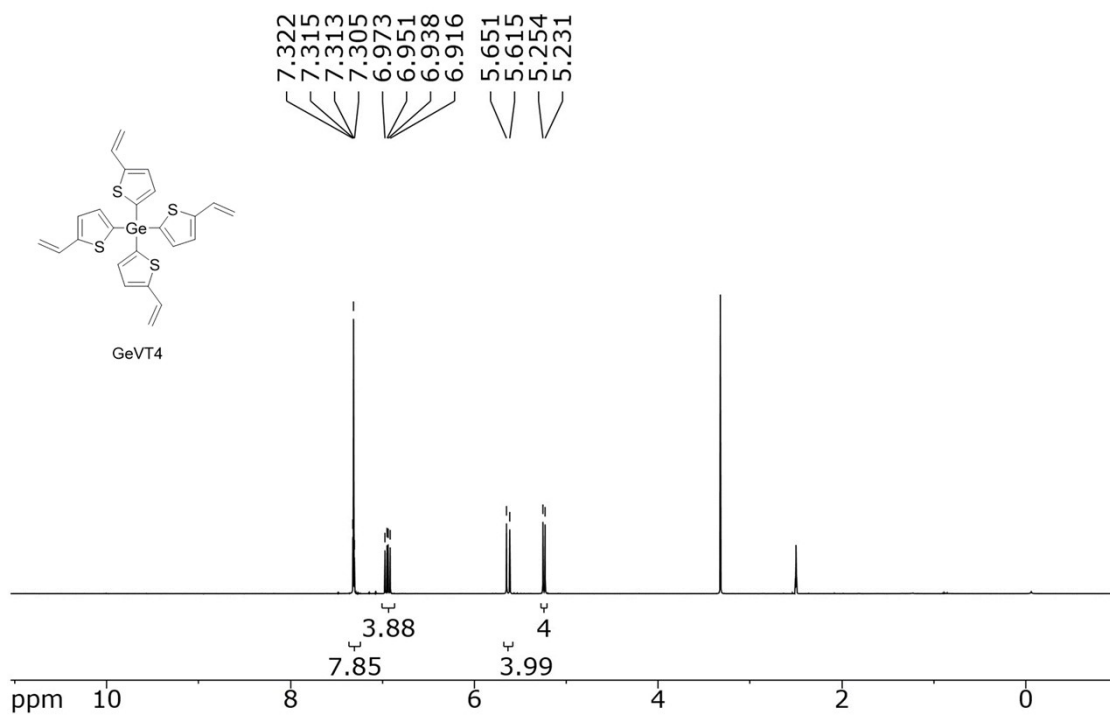

**Figure S17.** <sup>1</sup>H NMR spectrum of GeVT4 (500 MHz, DMSO-*d*<sub>6</sub>, r.t.)

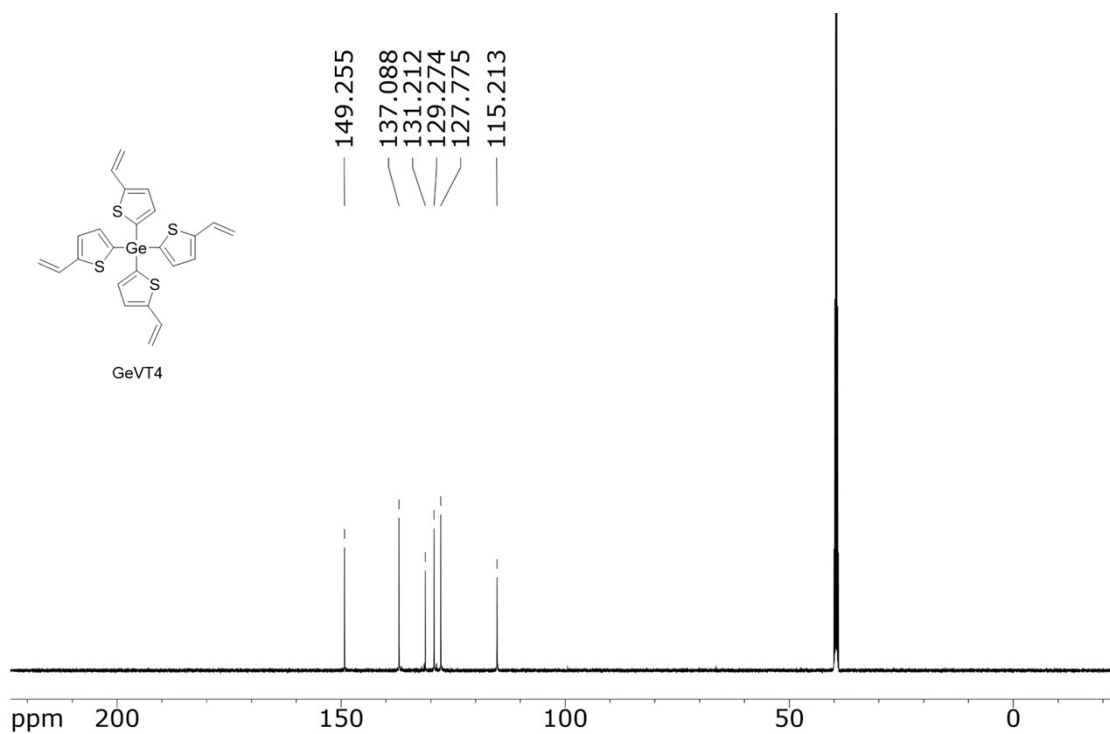

**Figure S18.** <sup>13</sup>C{<sup>1</sup>H} NMR spectrum of GeVT4 (126 MHz, DMSO-*d*<sub>6</sub>, r.t.)

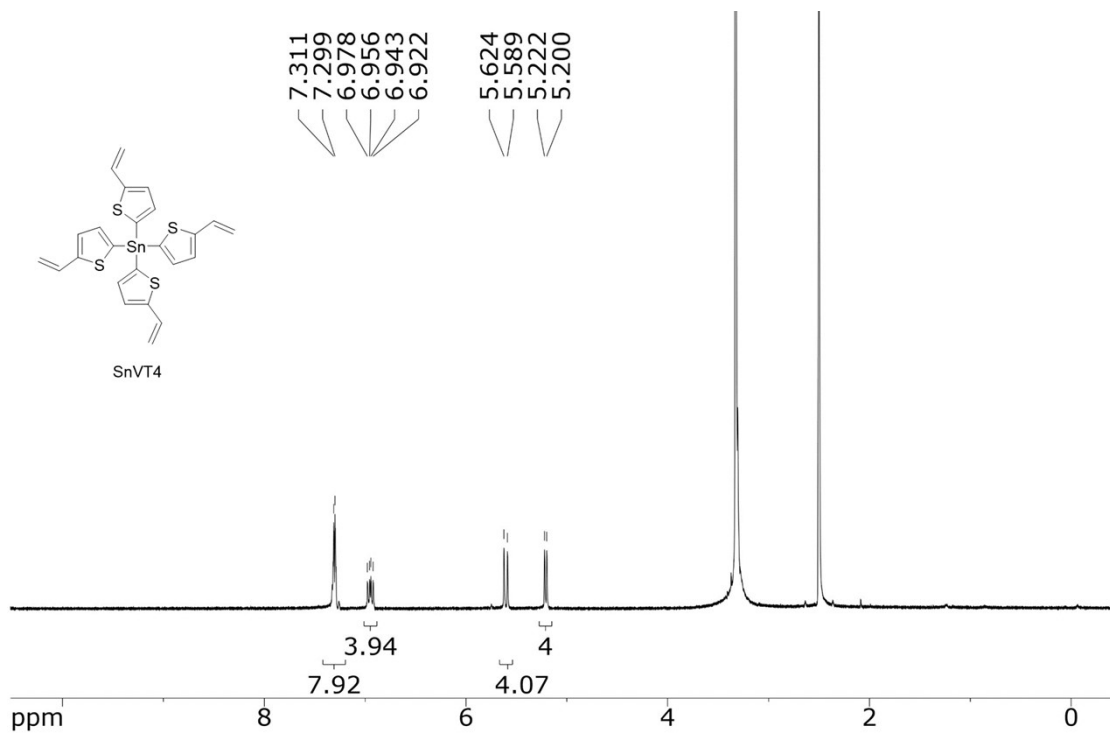

**Figure S19.**  $^1\text{H}$  NMR spectrum of SnVT4 (500 MHz,  $\text{DMSO-}d_6$ , r.t.)

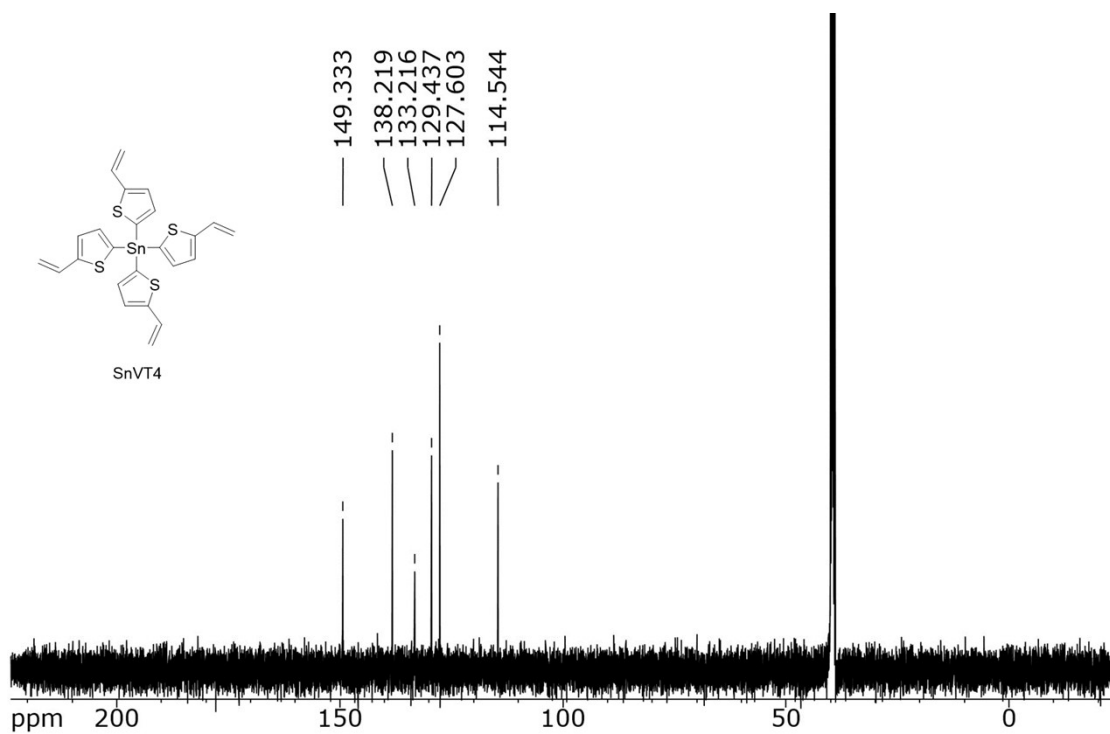

**Figure S20.**  $^{13}\text{C}\{^1\text{H}\}$  NMR spectrum of SnVT4 (126 MHz,  $\text{DMSO-}d_6$ , r.t.)



## S5. APCI-MS spectra

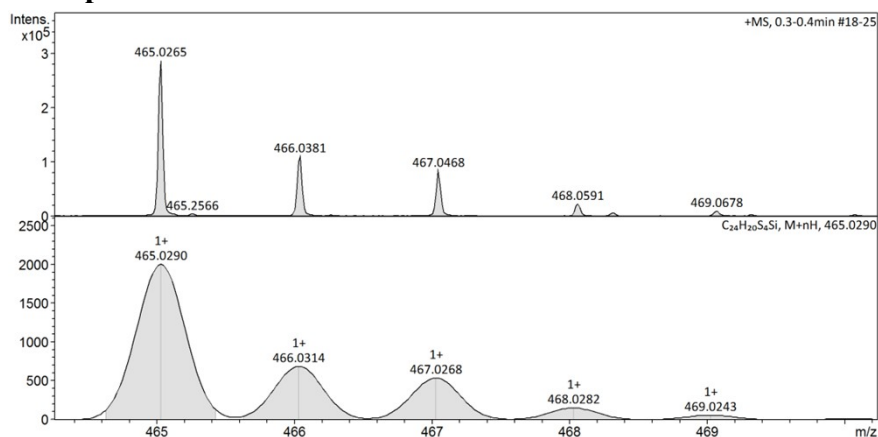

Figure S21. HR-MS spectrum of SiVT4 (top) with the calculated isotopic distribution (bottom).

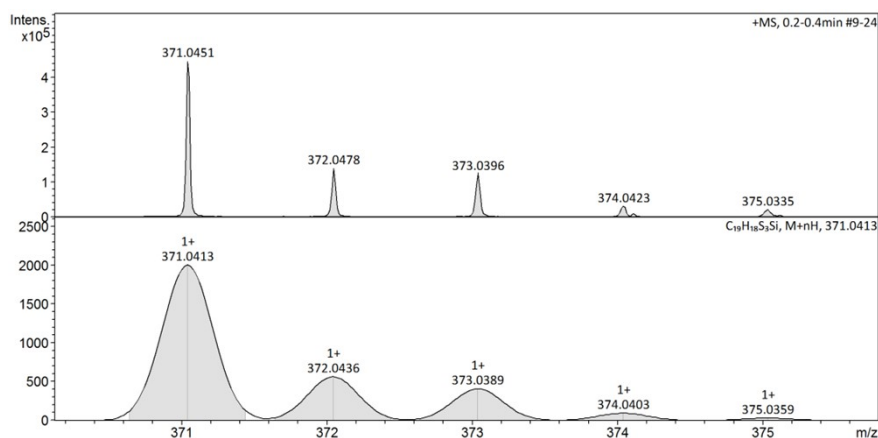

Figure S22. HR-MS spectrum of SiVT3 (top) with the calculated isotopic distribution (bottom).

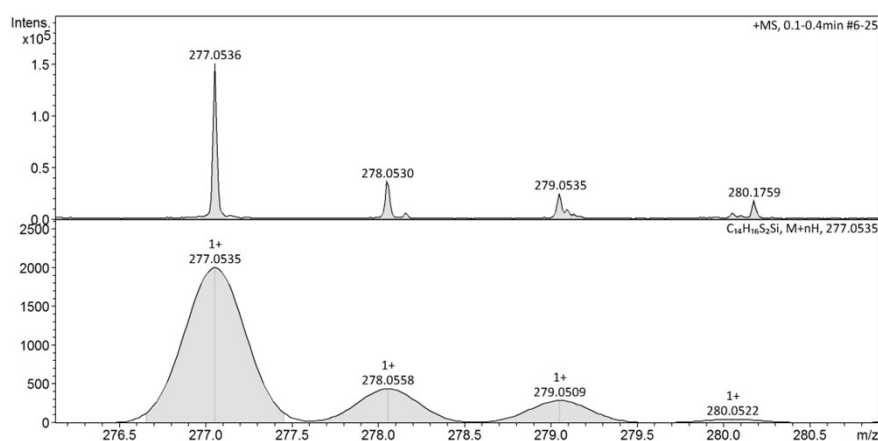

Figure S23. HR-MS spectrum of SiVT2 (top) with the calculated isotopic distribution (bottom).

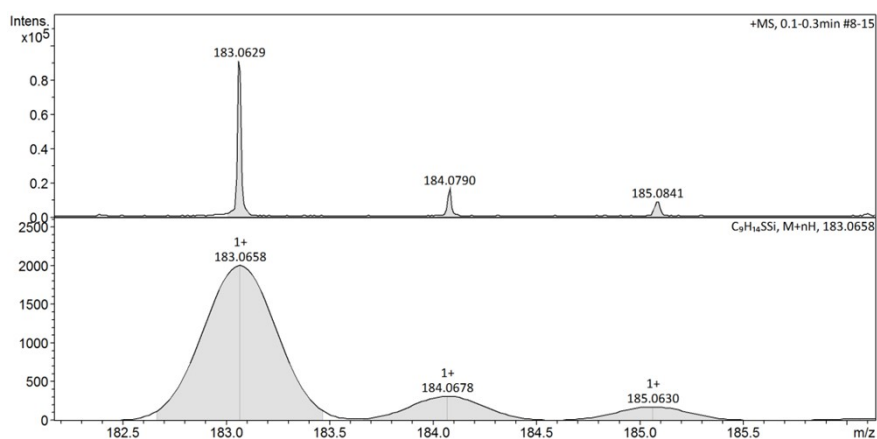

**Figure S24.** HR-MS spectrum of SiVT1 (top) with the calculated isotopic distribution (bottom).

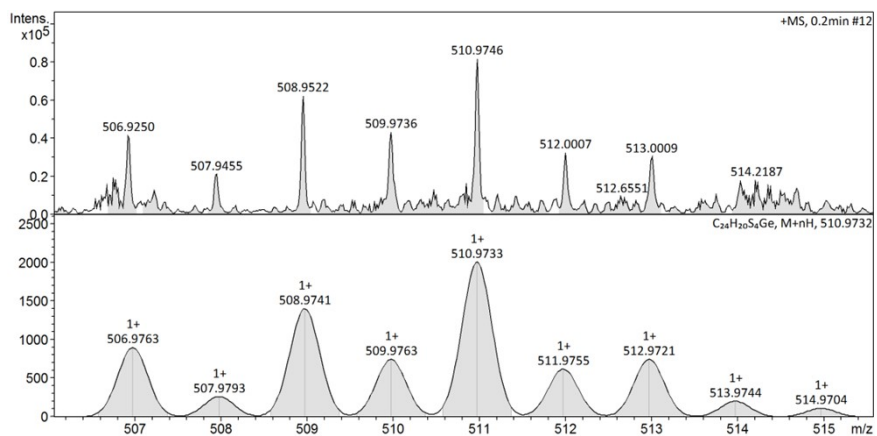

**Figure S25.** HR-MS spectrum of GeVT4 (top) with the calculated isotopic distribution (bottom).

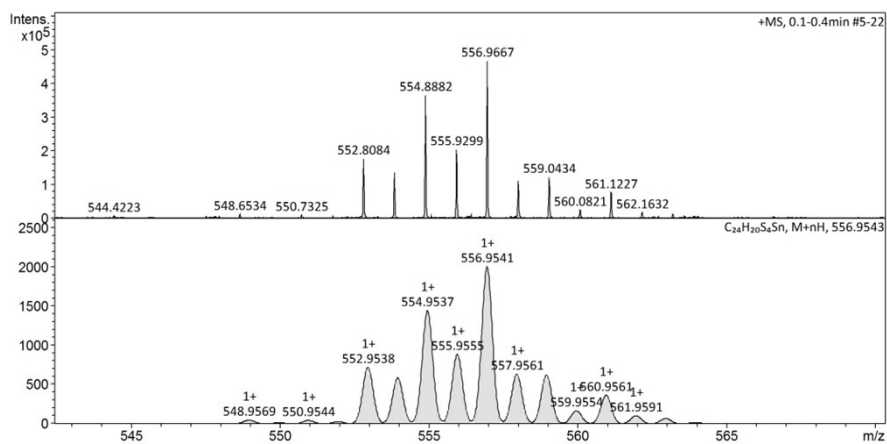

**Figure S26.** HR-MS spectrum of SnVT4 (top) with the calculated isotopic distribution (bottom).

## S6. ATR-IR Spectral Analysis and Discussion

As described in the main text, the characteristic C=C stretching band of the vinyl group at 1617  $\text{cm}^{-1}$  decreased after polymerization, accompanied by the appearance of an aliphatic C-H stretching band at 2919  $\text{cm}^{-1}$ . In this section, we discuss the newly emerged peak observed around 1700  $\text{cm}^{-1}$ , which was not addressed in the main text (Figure S27).

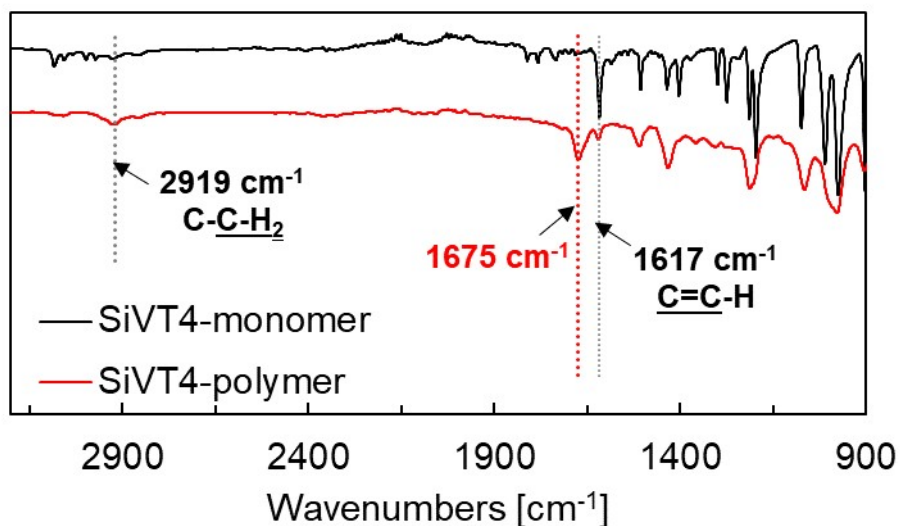

Figure S27. ATR spectra of SiVT4 and its corresponding polymer

The newly observed vibrational band around 1675  $\text{cm}^{-1}$  in the ATR-IR spectrum is tentatively attributed to constrained vibrational modes of carbon-carbon bonds and valence angles in aromatic fragments within the highly crosslinked network. Similar features have been reported in hyper-crosslinked polystyrene systems, where such bands arise from structural constraints rather than carbonyl functionalities. Although a minor contribution from trace oxidative species cannot be completely excluded, the dominant origin is considered to be associated with the rigid and highly interconnected polymer structure.<sup>3,4</sup>

## S7. Computational details

### S7.1. TD-DFT calculation of SiVT1-4, GeVT4 and SiVT4 dimer

TD-DFT calculations were performed using the Gaussian 16 software.<sup>4</sup> The molecular structures of SiVT4, SiVT3, SiVT2, SiVT1, GeVT4 and SiVT4 dimer used in TD-DFT calculations were optimized at the cam-B3LYP<sup>5</sup>/6-311+G(d,p) level. Frequency calculations were performed at the same calculation level. TD-DFT calculations were performed using cam-B3LYP functional. The longest-wavelength absorption bands of SiVT1-4 and GeVT4 correspond to S0 → S1 electronic transitions and are shown in Table S1. In addition, to clarify the origin of the UV-vis absorption

characteristics observed for the polymer (Fig. 3d), TD-DFT calculations were performed using the **SiVT4 dimer** as a model compound. All calculated transitions of the **SiVT4** monomer and dimer are summarized in **Table S2** and **Table S3**, respectively. For the monomer, the lowest-energy absorption band is mainly composed of several closely spaced excited states (S1–S3), each of which exhibits a significant oscillator strength. In addition, several higher-energy transitions with relatively small oscillator strengths are also observed. In contrast, the **SiVT4 dimer** shows a larger number of excited states within a similar energy range, together with a redistribution of oscillator strengths among these transitions. As a result, the electronic state density in the same spectral region increases compared to the monomer, which is consistent with the experimentally observed broadened and structured absorption band.

**Table S1.** The first transitions of **SiVT1–4** and **GeVT4** by TD-DFT at the cam-B3LYP/6-311+G(d,p) level

| Compound     | Wavelength [nm] | Oscillator strength [f] | HOMO -LUMO gap energy [eV] |
|--------------|-----------------|-------------------------|----------------------------|
| <b>SiVT4</b> | 282.03          | 0.2717                  | 6.922                      |
| <b>SiVT3</b> | 278.15          | 0.7192                  | 7.072                      |
| <b>SiVT2</b> | 277.47          | 0.7228                  | 7.014                      |
| <b>SiVT1</b> | 272.25          | 0.4266                  | 7.132                      |
| <b>GeVT4</b> | 279.00          | 0.3038                  | 6.942                      |

**Table S2.** The all transitions of **SiVT4** by TD-DFT at the cam-B3LYP/6-311+G(d,p) level

| State     | Wavelength [nm] | Oscillator strength [f] |
|-----------|-----------------|-------------------------|
| <b>S1</b> | 282.03          | 0.2717                  |
| <b>S2</b> | 276.69          | 0.5150                  |
| <b>S3</b> | 277.92          | 1.0076                  |
| <b>S4</b> | 262.70          | 0.0656                  |
| <b>S5</b> | 242.29          | 0.0418                  |
| <b>S6</b> | 241.79          | 0.0380                  |
| <b>S7</b> | 241.13          | 0.0583                  |
| <b>S8</b> | 239.16          | 0.0487                  |

**Table S3** The all transitions of **SiVT4 dimer** by TD-DFT at the cam-B3LYP/6-311+G(d,p) level

| State | Wavelength [nm] | Oscillator strength [f] |
|-------|-----------------|-------------------------|
| S1    | 277.41          | 0.4941                  |
| S2    | 275.26          | 0.3725                  |
| S3    | 274.01          | 0.6815                  |
| S4    | 263.28          | 0.6741                  |
| S5    | 263.89          | 0.6339                  |
| S6    | 260.60          | 0.2412                  |
| S7    | 240.05          | 0.0244                  |
| S8    | 238.81          | 0.0331                  |
| S9    | 238.50          | 0.0282                  |
| S10   | 238.11          | 0.0487                  |

## S7.2. Calculated molecular refractive index of vinylthiophene unit

The molar refraction  $[R]$  was evaluated using the Lorentz-Lorenz equation (1):

$$\frac{n_D^2 - 1}{n_D^2 + 2} = \frac{4\pi\rho N_A}{3 M_W} \alpha = \frac{[R]}{V_0} \#(1)$$

where  $n_D$  is the refractive index at the D-line,  $\rho$  is the density,  $N_A$  is the Avogadro constant,  $\alpha$  is the molecular polarizability,  $M_W$  is the molecular weight,  $[R]$  is the molar refraction, and  $V_0$  is the molecular volume.

First, the theoretical molar refraction of SiVT1–SiVT4 was calculated from the polarizability ( $\alpha$ ) based on Equation (2) (Table S4).

$$[R] = \frac{4\pi}{3} N_A \alpha \#(2)$$

A linear correlation was observed where the polarizability decreased by approximately 12 Å<sup>3</sup> per vinylthiophene unit, corresponding to a molar refraction of 30.26 cm<sup>3</sup> mol<sup>-1</sup> per unit.

Second, the experimental molar refraction was determined using the measured refractive index ( $n_D$ ) and the calculated molecular volume ( $V_0$ ) based on Equation (3).

$$n_D = \sqrt{\frac{1 + \frac{2[R]}{V_0}}{1 - \frac{[R]}{V_0}}} \#(3)$$

. A discrepancy between the calculated and experimental  $[R]$  values was observed, likely due to the inherent sensitivity and deviations in the calculated molecular volume.

Furthermore, the molar refractions of SiVT4, GeVT4, and SnVT4 were compared at a unified level

of theory (CAM-B3LYP/LANL2DZ). As a result, the trend in the theoretical molar refraction calculated from the polarizability based on Equation (2) was consistent with the trend observed in the experimentally measured refractive indices (**Table S5**).

**Table S4.** Calculated polarizability, molecular volume at the cam-B3LYP/6-311+G(d,p) level, and predicted molar refraction

|                                                           | SiVT4   | SiVT3   | SiVT2   | SiVT1   |
|-----------------------------------------------------------|---------|---------|---------|---------|
| Calc. $\alpha / \text{\AA}^3$                             | 59.35   | 47.29   | 34.73   | 22.53   |
| [ $R$ ] from Calc. $\alpha / \text{cm}^3 \text{mol}^{-1}$ | 149.68  | 119.27  | 87.60   | 56.82   |
| Measured $n_D$                                            | 1.58    | 1.61    | 1.65    | 1.69    |
| Calc. $V_0 / \text{cm}^3 \text{mol}^{-1}$                 | 340.294 | 264.939 | 273.029 | 109.736 |
| [ $R$ ] from Calc. $V_0 / \text{cm}^3 \text{mol}^{-1}$    | 113.25  | 91.86   | 99.58   | 41.94   |

**Table S5.** Calculated polarizability, molecular volume at the cam-B3LYP/LANL2DZ level, and predicted molar refraction

|                                                           | SiVT4  | GeVT4  | SnVT4  |
|-----------------------------------------------------------|--------|--------|--------|
| Calc. $\alpha / \text{\AA}^3$                             | 50.66  | 50.78  | 54.07  |
| [ $R$ ] from Calc. $\alpha / \text{cm}^3 \text{mol}^{-1}$ | 127.74 | 127.96 | 136.26 |
| Measured $n_D$                                            | 1.68   | 1.68   | 1.69   |
| Calc. $V_0 / \text{cm}^3 \text{mol}^{-1}$                 | 360.31 | 296.14 | 340.67 |
| [ $R$ ] from Calc. $V_0 / \text{cm}^3 \text{mol}^{-1}$    | 136.28 | 111.9  | 122.25 |

### S7.3. Calculated structures and Cartesian coordinates

#### SiVT4

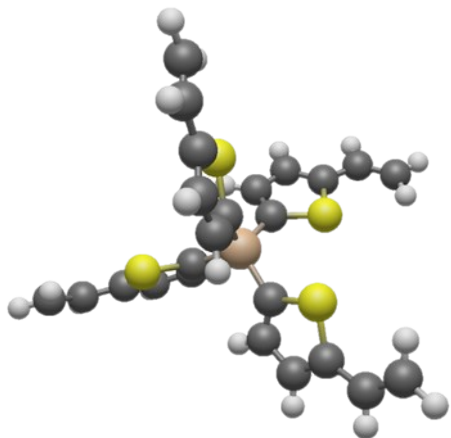

0 1

|    |             |             |             |   |             |             |             |
|----|-------------|-------------|-------------|---|-------------|-------------|-------------|
| Si | -0.11240400 | -0.16612800 | -0.21867800 | C | 0.92678400  | 0.87501600  | -1.36643700 |
| C  | 0.47927200  | 1.76593500  | -2.30621800 | C | 1.51700800  | 2.46521600  | -2.97147400 |
| S  | 2.66026300  | 0.90078800  | -1.30933800 | H | -0.57124600 | 1.91535800  | -2.51889800 |
| C  | 2.76738000  | 2.11128200  | -2.54403200 | H | 1.35102300  | 3.20424300  | -3.74445200 |
| C  | -1.62868000 | -0.68845000 | -1.17132800 | C | 1.48908400  | -3.92166100 | 0.45487000  |
| C  | -1.71744200 | -1.01858000 | -2.49789800 | H | -0.14076200 | -3.21530400 | -0.85761600 |
| S  | -3.16935800 | -0.90611800 | -0.40467100 | C | 2.35413900  | -3.38076200 | 1.36538800  |
| C  | -3.00903300 | -1.44613500 | -2.89521500 | H | 1.48170900  | -4.97597300 | 0.21098100  |
| H  | -0.87600700 | -0.95147800 | -3.17520900 | C | -0.59792000 | 0.81407900  | 1.29064900  |
| C  | -3.91734300 | -1.44436000 | -1.87161400 | C | -0.88871600 | 0.33338400  | 2.53985100  |
| H  | -3.26625600 | -1.74164500 | -3.90410400 | S | -0.83733800 | 2.53188400  | 1.24855900  |
| C  | 0.79936000  | -1.69338500 | 0.34217300  | C | -1.30570900 | 1.33287700  | 3.45376200  |
| C  | 0.61271400  | -2.96798800 | -0.12142700 | H | -0.80200700 | -0.71334400 | 2.80015500  |
| S  | 2.07733300  | -1.67607100 | 1.51790500  | C | -1.33445700 | 2.58680800  | 2.90737300  |
| H  | -1.57116200 | 1.13850300  | 4.48473900  | H | 4.93148900  | -4.21275900 | 3.52383300  |
| C  | -1.70884400 | 3.81485200  | 3.59438900  | C | 4.02879500  | 2.64432500  | -3.03913000 |
| C  | -1.73207200 | 5.04098500  | 3.07946000  | C | 5.25029500  | 2.30189000  | -2.63943700 |
| H  | -1.45899100 | 5.24017600  | 2.04924100  | H | 5.41892300  | 1.55690600  | -1.86989800 |
| H  | -2.02747900 | 5.89097200  | 3.68036300  | H | 6.12728400  | 2.76229800  | -3.07502200 |
| C  | 3.36566900  | -4.10102500 | 2.12569800  | C | -5.32049400 | -1.82224200 | -1.96754400 |
| C  | 4.21446400  | -3.58563200 | 3.01061600  | C | -6.21672300 | -1.81499600 | -0.98481100 |
| H  | 4.22573200  | -2.52885700 | 3.25301200  | H | -5.96483500 | -1.51022500 | 0.02478800  |

|   |             |             |             |   |             |             |             |
|---|-------------|-------------|-------------|---|-------------|-------------|-------------|
| H | -7.24047700 | -2.11620000 | -1.16373400 | H | 3.91808100  | 3.39753400  | -3.81424600 |
| H | 3.39945400  | -5.16722800 | 1.91973400  | H | -5.62828800 | -2.13627700 | -2.96104700 |
| H | -1.99211600 | 3.67276300  | 4.63359000  |   |             |             |             |

### SiVT3

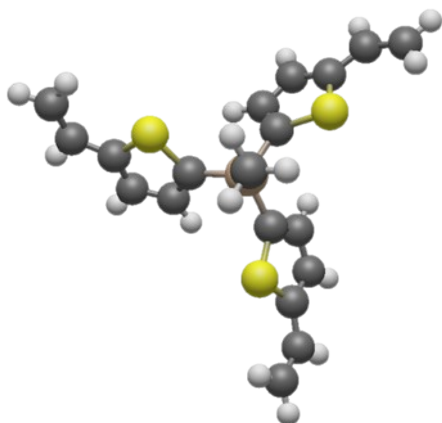

0 1

|    |             |             |             |   |             |             |             |
|----|-------------|-------------|-------------|---|-------------|-------------|-------------|
| Si | -0.00012200 | 0.00018200  | 0.69063700  | C | 1.08603500  | -6.27917400 | 0.24331000  |
| C  | 0.78197600  | -1.56188800 | 0.02762100  | C | -0.00030900 | 0.00024300  | 2.55896600  |
| C  | 1.70192500  | -1.66387900 | -0.98037900 | H | -0.53733400 | -0.86716400 | 2.94953700  |
| S  | 0.40186000  | -3.14315700 | 0.63679100  | H | 1.01929600  | -0.03098100 | 2.94979300  |
| C  | 2.09704900  | -2.99631800 | -1.26511700 | H | -0.48316100 | 0.89898600  | 2.94942800  |
| H  | 2.08993500  | -0.79983300 | -1.50372600 | H | 0.36531500  | -6.01201600 | 1.00805700  |
| C  | 1.48203300  | -3.92514900 | -0.47250500 | H | 1.30600700  | -7.33199100 | 0.12511400  |
| H  | 2.81589700  | -3.26479700 | -2.02824700 | H | -5.38990200 | 2.68885100  | 1.00858100  |
| C  | -1.74392100 | 0.10396700  | 0.02742700  | H | -7.00330000 | 2.53442400  | 0.12546500  |
| C  | -2.29214100 | -0.64175000 | -0.98063400 | C | 0.96177600  | 1.45847300  | 0.02763100  |
| S  | -2.92338200 | 1.22373700  | 0.63651800  | C | 0.58963000  | 2.30725600  | -0.97925700 |
| C  | -3.64367900 | -0.31787100 | -1.26534100 | S | 2.52193000  | 1.91868500  | 0.63594700  |
| H  | -1.73782500 | -1.40970000 | -1.50410200 | C | 1.54615100  | 3.31558900  | -1.26378000 |
| C  | -4.14070300 | 0.67901000  | -0.47264000 | H | -0.35307300 | 2.21211100  | -1.50200700 |
| H  | -4.23556100 | -0.80623000 | -2.02847700 | C | 2.65866200  | 3.24619300  | -0.47213100 |
| C  | -5.48805900 | 1.22833000  | -0.52088700 | H | 1.41889000  | 4.07315600  | -2.02607600 |
| H  | -6.12605800 | 0.77171800  | -1.27246000 | C | 3.80848100  | 4.13782200  | -0.52052600 |
| C  | 1.67985300  | -5.36665900 | -0.52085100 | H | 3.73168600  | 4.91955200  | -1.27112200 |
| H  | 2.39452600  | -5.69084800 | -1.27220900 | C | 4.89616600  | 4.07868300  | 0.24281400  |
| C  | -5.98154100 | 2.19852000  | 0.24360500  | H | 5.69815800  | 4.79536800  | 0.12469900  |

H 5.02538000 3.32020700 1.00679800

## SiVT2

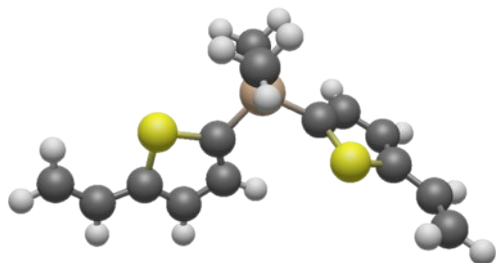

0 1

|    |             |             |             |   |             |             |             |
|----|-------------|-------------|-------------|---|-------------|-------------|-------------|
| Si | -0.05029400 | 1.48905800  | 0.17433200  | C | 4.89658600  | -1.44938300 | -0.04320600 |
| C  | 1.61313000  | 0.73651600  | -0.24068400 | H | 5.67775500  | -1.39211900 | -0.79617000 |
| C  | 2.40802900  | 1.02014100  | -1.31841200 | C | -5.89449700 | -1.09016200 | 0.33742700  |
| S  | 2.38512400  | -0.45987000 | 0.75235500  | C | 5.04707300  | -2.28289000 | 0.98241300  |
| C  | 3.62213900  | 0.28621500  | -1.35042500 | C | -0.10546400 | 2.01094900  | 1.97147300  |
| H  | 2.13379400  | 1.74243100  | -2.07629100 | C | -0.33112100 | 2.96174200  | -0.94821000 |
| C  | 3.76615400  | -0.56633700 | -0.29164800 | H | 0.07686700  | 1.16494400  | 2.63765800  |
| H  | 4.36879100  | 0.38326300  | -2.12780600 | H | 0.65053200  | 2.77216900  | 2.17804800  |
| C  | -1.35759800 | 0.18236000  | -0.13741600 | H | -1.08212700 | 2.42908500  | 2.22881300  |
| C  | -1.21728900 | -1.00292700 | -0.80570200 | H | 0.43052200  | 3.73000500  | -0.79475100 |
| S  | -3.00482400 | 0.36693800  | 0.38267600  | H | -0.32047500 | 2.67063500  | -2.00056600 |
| C  | -2.41693800 | -1.75508300 | -0.90391100 | H | -1.30602000 | 3.41109800  | -0.74342200 |
| H  | -0.27160100 | -1.33151500 | -1.21644100 | H | 4.29989500  | -2.38055000 | 1.76204000  |
| C  | -3.48797500 | -1.14955700 | -0.30901100 | H | 5.93193900  | -2.89897600 | 1.07317600  |
| H  | -2.48997600 | -2.71666900 | -1.39522300 | H | -5.82344300 | -0.12710600 | 0.83048700  |
| C  | -4.84511900 | -1.67043700 | -0.23852300 | H | -6.86584000 | -1.56687900 | 0.33288000  |
| H  | -4.97395400 | -2.63660800 | -0.71857200 |   |             |             |             |

## SiVT1

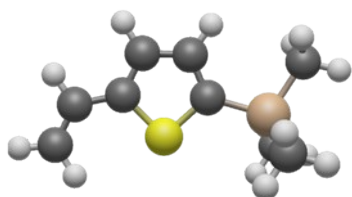

0 1

|    |             |             |             |   |             |             |             |
|----|-------------|-------------|-------------|---|-------------|-------------|-------------|
| Si | 2.08354800  | -0.13677800 | -0.00004300 | H | 3.49529900  | -1.46078100 | -1.56200700 |
| C  | 0.27416700  | 0.36994200  | 0.00007300  | H | 1.83675100  | -2.06256600 | -1.56188300 |
| C  | -0.24367400 | 1.63648900  | -0.00000500 | H | -3.67490800 | -1.95167400 | 0.00045700  |
| S  | -1.02259600 | -0.78473100 | 0.00003600  | H | -5.32837500 | -1.13104400 | 0.00010800  |
| C  | -1.66286000 | 1.68305400  | -0.00006800 | C | 2.44602500  | -1.15655500 | 1.53286300  |
| H  | 0.37621000  | 2.52369000  | -0.00000100 | C | 3.11189100  | 1.43201300  | 0.00066600  |
| C  | -2.24522200 | 0.44700700  | -0.00000500 | H | 3.49568400  | -1.46157800 | 1.56066300  |
| H  | -2.23911800 | 2.59922800  | -0.00013500 | H | 2.23593100  | -0.58983700 | 2.44282100  |
| C  | -3.67298600 | 0.16530600  | -0.00001800 | H | 1.83727600  | -2.06371600 | 1.56069600  |
| H  | -4.29965200 | 1.05295100  | -0.00022500 | H | 2.91545300  | 2.04325900  | -0.88328800 |
| C  | -4.25078400 | -1.03300000 | 0.00019200  | H | 2.91510800  | 2.04242300  | 0.88512600  |
| C  | 2.44572300  | -1.15556100 | -1.53367300 | H | 4.17709800  | 1.18628100  | 0.00075700  |
| H  | 2.23542500  | -0.58822400 | -2.44320200 |   |             |             |             |

## GeVT4

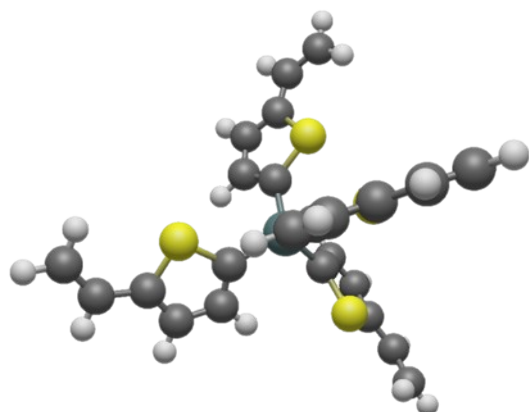

0 1

|    |             |             |             |   |             |             |             |
|----|-------------|-------------|-------------|---|-------------|-------------|-------------|
| Ge | -0.21090100 | -0.10950600 | -0.13286900 | C | 0.01311400  | -0.01206400 | 2.82801000  |
| C  | 0.96301200  | -1.17384700 | -1.25039900 | S | 2.23214800  | 0.71599800  | 1.80063500  |
| C  | 1.26355300  | -0.93805700 | -2.56197200 | C | 0.86959200  | 0.29370900  | 3.91753700  |
| S  | 1.77045900  | -2.60367900 | -0.69615200 | H | -1.00450700 | -0.35876300 | 2.94840100  |
| C  | 2.13626900  | -1.90520800 | -3.12541800 | C | 2.11335200  | 0.70871700  | 3.53154400  |
| H  | 0.87309000  | -0.08980400 | -3.10884800 | H | 0.57951500  | 0.20779400  | 4.95657100  |
| C  | 2.50537600  | -2.88262000 | -2.24384100 | C | 3.20859700  | 1.08738200  | 4.41257300  |
| H  | 2.48683500  | -1.88021800 | -4.14897200 | H | 2.96871200  | 1.02269100  | 5.47025300  |
| C  | -1.89707300 | -1.04340000 | 0.08216000  | C | 3.39067700  | -4.00455400 | -2.52133200 |
| C  | -2.17283000 | -2.32030800 | -0.31714800 | H | 3.76289500  | -4.03320700 | -3.54166000 |
| S  | -3.28987000 | -0.33765500 | 0.83704600  | C | -5.62132300 | -1.89965700 | 1.04890400  |
| C  | -3.49656600 | -2.73572500 | -0.01535000 | H | -6.06843400 | -2.86601300 | 0.83295600  |
| H  | -1.44807700 | -2.94894400 | -0.81726500 | C | -0.17493100 | 5.23510200  | -2.43230700 |
| C  | -4.23692100 | -1.77616100 | 0.61578300  | H | -0.88373600 | 5.66540200  | -3.13436300 |
| H  | -3.89300200 | -3.71300000 | -0.25802100 | C | 4.42336100  | 1.48796700  | 4.04788200  |
| C  | -0.55214200 | 1.56674700  | -1.04805000 | C | 0.85497600  | 5.96926800  | -2.02073600 |
| C  | -1.59089500 | 1.82394900  | -1.89849300 | C | -6.35159600 | -0.97065100 | 1.65950500  |
| S  | 0.48639300  | 2.94782800  | -0.93397500 | C | 3.76587600  | -4.95412500 | -1.66884300 |
| C  | -1.55297000 | 3.12640200  | -2.46079800 | H | 3.42681700  | -4.97332000 | -0.63910500 |
| H  | -2.36855800 | 1.10262300  | -2.11290600 | H | 4.43240300  | -5.74807300 | -1.97893900 |
| C  | -0.48349900 | 3.86723100  | -2.04047800 | H | 0.99278700  | 6.98215500  | -2.37549100 |
| H  | -2.29371100 | 3.50950600  | -3.15052200 | H | 1.59127300  | 5.59099500  | -1.32042600 |
| C  | 0.59925600  | 0.16862900  | 1.60700200  | H | 4.71648900  | 1.57057900  | 3.00725500  |

|   |             |            |            |   |             |             |            |
|---|-------------|------------|------------|---|-------------|-------------|------------|
| H | 5.16887200  | 1.74738400 | 4.78794600 | H | -7.37797100 | -1.16615500 | 1.94070400 |
| H | -5.95654200 | 0.01033200 | 1.89897300 |   |             |             |            |

### SnVT4

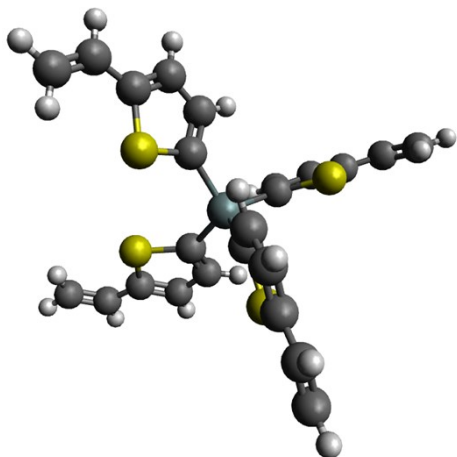

0 1

|    |             |             |             |   |             |             |             |
|----|-------------|-------------|-------------|---|-------------|-------------|-------------|
| Sn | 0.07369200  | 0.10430600  | -0.16033300 | H | -1.52875400 | 5.16040100  | 0.37944100  |
| C  | -1.04882700 | -1.11859400 | -1.45182900 | C | 0.64944300  | -0.91701600 | 1.58264500  |
| C  | -0.55172700 | -1.97701000 | -2.40954500 | C | 0.69067500  | -0.40365400 | 2.86106100  |
| S  | -2.84572100 | -1.21669600 | -1.41927100 | S | 1.19727300  | -2.63153100 | 1.59485200  |
| C  | -1.55310100 | -2.71928600 | -3.12417800 | C | 1.14856500  | -1.32847700 | 3.86080200  |
| H  | 0.50852600  | -2.08738200 | -2.60929600 | H | 0.39537900  | 0.61271200  | 3.09678000  |
| C  | -2.84155200 | -2.44462800 | -2.72903500 | C | 1.46855000  | -2.57230700 | 3.36880100  |
| H  | -1.32135300 | -3.43406800 | -3.90544900 | H | 1.23473000  | -1.07599200 | 4.91139400  |
| C  | 1.74307300  | 0.71777200  | -1.28588800 | C | -4.05967100 | -3.03855800 | -3.27085200 |
| C  | 1.79924900  | 0.89919700  | -2.65172600 | H | -3.88802400 | -3.76804200 | -4.06201600 |
| S  | 3.33696700  | 1.12183600  | -0.55185300 | C | 5.39380100  | 1.97992700  | -2.35682500 |
| C  | 3.07063600  | 1.35465200  | -3.14292300 | H | 5.65367500  | 2.18852300  | -3.39436800 |
| H  | 0.95334100  | 0.71275300  | -3.30419500 | C | -3.59483200 | 4.33815400  | 2.14422100  |
| C  | 4.01857500  | 1.53146900  | -2.16182700 | H | -3.56585900 | 5.41268300  | 1.96527000  |
| H  | 3.27275700  | 1.54210200  | -4.19128000 | C | 1.95585000  | -3.71057300 | 4.14128200  |
| C  | 0.97841100  | 1.82154700  | 0.44316600  | H | 2.06549100  | -3.51324000 | 5.20739200  |
| C  | 0.71949100  | 3.11454200  | 0.04259100  | C | -5.32411400 | -2.77290800 | -2.89090400 |
| S  | -2.38502000 | 1.80207300  | 1.56794200  | C | 2.26811700  | -4.93216700 | 3.66801800  |
| C  | -1.60454600 | 4.10145100  | 0.59812000  | C | -4.53968100 | 3.83774300  | 2.96316700  |
| H  | 0.08834800  | 3.36762400  | -0.63516300 | C | 6.32901700  | 2.14990700  | -1.40276900 |
| C  | -2.56339500 | 3.58521300  | 1.43770800  | H | 7.32881100  | 2.48897200  | -1.65350500 |

|   |             |             |             |   |             |             |            |
|---|-------------|-------------|-------------|---|-------------|-------------|------------|
| H | 6.12718000  | 1.95588300  | -0.35208000 | H | 2.17784100  | -5.18576200 | 2.61452900 |
| H | -6.16574700 | -3.27239100 | -3.35953000 | H | -5.26532900 | 4.48660400  | 3.44255900 |
| H | -5.55522100 | -2.05569100 | -2.10699800 | H | -4.61768000 | 2.77439100  | 3.1766170  |
| H | 2.62409600  | -5.71466200 | 4.33015300  |   |             |             |            |

### SiVT4 dimer

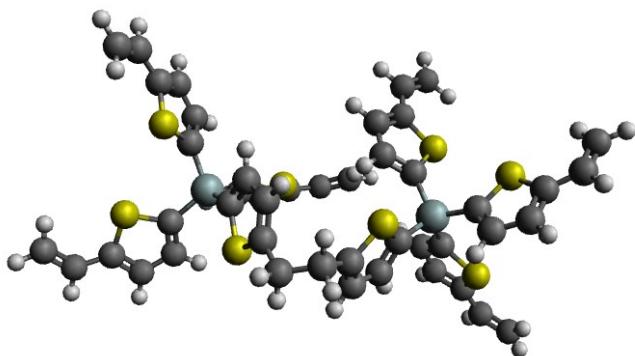

0 1

|    |            |             |             |   |             |             |             |
|----|------------|-------------|-------------|---|-------------|-------------|-------------|
| Si | 4.34108200 | 0.03599100  | -0.36096600 | C | 6.34639000  | -3.63372200 | 0.84898200  |
| C  | 5.64073900 | 1.33553900  | -0.69441600 | H | 5.99147400  | -4.73480500 | -0.96750400 |
| C  | 5.48010000 | 2.50872800  | -1.38338900 | C | 3.31552000  | 0.50847400  | 1.11904300  |
| S  | 7.25182800 | 1.24364100  | -0.05809700 | C | 2.74286900  | -0.31764000 | 2.04924800  |
| C  | 6.63694300 | 3.32759200  | -1.39772700 | S | 2.87336000  | 2.15016000  | 1.46197100  |
| H  | 4.55371500 | 2.77884000  | -1.87328800 | C | 1.95959200  | 0.35975300  | 3.02148400  |
| C  | 7.69256800 | 2.78337200  | -0.71907500 | H | 2.88051100  | -1.39098100 | 2.04224100  |
| H  | 6.69430100 | 4.28675700  | -1.89573900 | C | 1.92908800  | 1.71018700  | 2.83733700  |
| C  | 3.28640400 | -0.07920500 | -1.89511700 | H | 1.44153900  | -0.14569500 | 3.82576600  |
| C  | 3.68115100 | 0.08286300  | -3.19693400 | C | 1.23965900  | 2.76123300  | 3.66015000  |
| S  | 1.60598600 | -0.50949400 | -1.83739600 | H | 1.81724300  | 2.94746600  | 4.57101100  |
| C  | 2.64661700 | -0.13829200 | -4.13989400 | H | 1.23097400  | 3.70568900  | 3.11126900  |
| H  | 4.69057600 | 0.35952500  | -3.47193200 | C | -0.19589400 | 2.39353700  | 4.06207000  |
| C  | 1.45191600 | -0.47484300 | -3.56350700 | H | -0.59271300 | 3.19276200  | 4.69550200  |
| H  | 2.77389600 | -0.05099500 | -5.21114400 | H | -0.18114400 | 1.49626000  | 4.68489300  |
| C  | 5.11186900 | -1.63260300 | -0.03819200 | C | -1.11310200 | 2.17892600  | 2.89209800  |
| C  | 5.16095300 | -2.68399500 | -0.91364000 | C | -1.29968100 | 2.96514400  | 1.79531500  |
| S  | 5.93683100 | -2.05270500 | 1.43139500  | S | -2.12646400 | 0.78283800  | 2.80892000  |
| C  | 5.85682700 | -3.81410000 | -0.41491400 | C | -2.25366900 | 2.43628000  | 0.88475100  |
| H  | 4.70445900 | -2.64634700 | -1.89398700 | H | -0.77006700 | 3.89408000  | 1.62976200  |
|    |            |             |             | C | -2.80399400 | 1.24682800  | 1.27926000  |

|    |             |             |             |   |              |             |             |
|----|-------------|-------------|-------------|---|--------------|-------------|-------------|
| H  | -2.52482700 | 2.92160400  | -0.04378500 | C | -6.64153400  | 3.71699400  | -3.41163100 |
| Si | -4.03799600 | 0.22888700  | 0.32835400  | H | -6.34079100  | 3.95664600  | -4.42781300 |
| C  | -4.60492800 | 1.20490000  | -1.15620300 | C | 9.01328600   | 3.37633800  | -0.56342600 |
| C  | -3.99262800 | 1.30400400  | -2.37739100 | H | 9.12254500   | 4.34659900  | -1.04001500 |
| S  | -6.01134900 | 2.21999100  | -1.11573400 | C | 0.21080200   | -0.76096800 | -4.27026300 |
| C  | -4.64375700 | 2.18941400  | -3.27204000 | H | 0.28275700   | -0.65458600 | -5.34926600 |
| H  | -3.09583800 | 0.75377900  | -2.63194100 | C | 7.09737500   | -4.60705500 | 1.62906600  |
| C  | -5.76089600 | 2.77272400  | -2.73840100 | H | 7.25870700   | -5.55344700 | 1.12042500  |
| H  | -4.30502600 | 2.38915700  | -4.28036500 | C | -9.28626200  | -2.78829100 | 2.38380800  |
| C  | -3.22914900 | -1.34621200 | -0.26724100 | C | -3.59926600  | -5.27662400 | -2.87202500 |
| C  | -2.01454000 | -1.85079200 | 0.11435900  | C | 7.58177800   | -4.44151800 | 2.85674200  |
| S  | -3.99062400 | -2.43404600 | -1.38773000 | C | -0.94699300  | -1.13359900 | -3.73155800 |
| C  | -1.70048700 | -3.10052400 | -0.47855400 | C | 10.05073400  | 2.85346600  | 0.08430800  |
| H  | -1.35550100 | -1.33687300 | 0.80104300  | H | 9.99769300   | 1.88933900  | 0.57753700  |
| C  | -2.67522400 | -3.56174800 | -1.31902200 | H | 10.99409700  | 3.38047600  | 0.14060800  |
| H  | -0.78090800 | -3.64127400 | -0.29690300 | H | -1.80984900  | -1.33213700 | -4.35388500 |
| C  | -5.49254500 | -0.12754500 | 1.44285900  | H | -1.07481400  | -1.26875700 | -2.66336200 |
| C  | -5.90133200 | 0.63026400  | 2.50825900  | H | 8.12940100   | -5.23374200 | 3.34999600  |
| S  | -6.59229900 | -1.44815100 | 1.20468800  | H | 7.45185600   | -3.51777500 | 3.40943800  |
| C  | -7.08723800 | 0.15920000  | 3.12521500  | H | -3.47498200  | -6.21674800 | -3.39312900 |
| H  | -5.36123100 | 1.50567900  | 2.84399300  | H | -4.53293400  | -4.74832100 | -3.02987600 |
| C  | -7.59348700 | -0.96548800 | 2.53425400  | H | -10.18689600 | -3.24908200 | 2.76771900  |
| H  | -7.55273300 | 0.62937700  | 3.98162600  | H | -8.81687700  | -3.26527400 | 1.53072500  |
| C  | -8.78947500 | -1.68835900 | 2.94288600  | C | -7.73449100  | 4.28526000  | -2.90978800 |
| H  | -9.30094800 | -1.25236700 | 3.79656600  | H | -8.08105300  | 4.08154100  | -1.90280500 |
| C  | -2.64349400 | -4.80464500 | -2.07644900 | H | -8.32180000  | 4.97743200  | -3.49871400 |
| H  | -1.72899300 | -5.37736600 | -1.95052100 |   |              |             |             |

## S8. References

- 1 A. B. Pangborn, M. A. Giardello, R. H. Grubbs, R. K. Rosen and F. J. Timmers, *Organometallics*, 1996, **15**, 1518-1520.
- 2 Y. Kurishiba, A. Oguri, D. Yamamoto, C. Homma, R. Goseki and T. Ishizone, *Macromolecules*, 2024, **57**, 8601–8609.
- 3 Tsyurupa, M. P.; Borisov, Y. A.; Blinnikova, Z. K.; Platonova, N. P.; Ul'yanov, A. V.; Buryak, A. K.; Davankov, V. A. On the Origin of Absorbance Band around 1700 Cm<sup>-1</sup> in FTIR Spectra of Hypercrosslinked Polystyrene. *Prot. Met. Phys. Chem. Surf.* 2014, 50 (1), 59–63.

- 4 Tsyurupa, M. P.; Blinnikova, Z. K.; Davidovich, Y. A.; Lyubimov, S. E.; Naumkin, A. V.; Davankov, V. A. On the Nature of “Functional Groups” in Non-Functionalized Hypercrosslinked Polystyrenes. *React. Funct. Polym.* 2012, 72 (12), 973–982.
- 5 M. J. Frisch, G. W. Trucks, H. B. Schlegel, G. E. Scuseria, M. A. Robb, J. R. Cheeseman, G. Scalmani, V. Barone, G. A. Petersson, H. Nakatsuji, X. Li, M. Caricato, A. V. Marenich, J. Bloino, B. G. Janesko, R. Gomperts, B. Mennucci, H. P. Hratchian, J. V. Ortiz, A. F. Izmaylov, J. L. Sonnenberg, D. Williams-Young, F. Ding, F. Lipparini, F. Egidi, J. Goings, B. Peng, A. Petrone, T. Henderson, D. Ranasinghe, V. G. Zakrzewski, J. Gao, N. Rega, G. Zheng, W. Liang, M. Hada, M. Ehara, K. Toyota, R. Fukuda, J. Hasegawa, M. Ishida, T. Nakajima, Y. Honda, O. Kitao, H. Nakai, T. Vreven, K. Throssell, J. A. Montgomery, Jr., J. E. Peralta, F. Ogliaro, M. J. Bearpark, J. J. Heyd, E. N. Brothers, K. N. Kudin, V. N. Staroverov, T. A. Keith, R. Kobayashi, J. Normand, K. Raghavachari, A. P. Rendell, J. C. Burant, S. S. Iyengar, J. Tomasi, M. Cossi, J. M. Millam, M. Klene, C. Adamo, R. Cammi, J. W. Ochterski, R. L. Martin, K. Morokuma, O. Farkas, J. B. Foresman, and D. J. Fox, Gaussian, Inc., Wallingford CT, 2016.
- 6 T. Yanai, D. P. Tew and N. C. Handy, *Chem. Phys. Lett.*, 2004, **393**, 51–57.
